# Supplementary material for: Synthesis and Cytotoxic Evaluation of a Series of 2-Amino-Naphthoquinones against Human Cancer Cells
Source: PubMed Central journal article supplement (PMC6271085; doi:10.3390/molecules190913188), 2014-08-26

# Supplementary Materials

Figure S1. IR (ATR,  $\text{cm}^{-1}$ ) of compound 2.

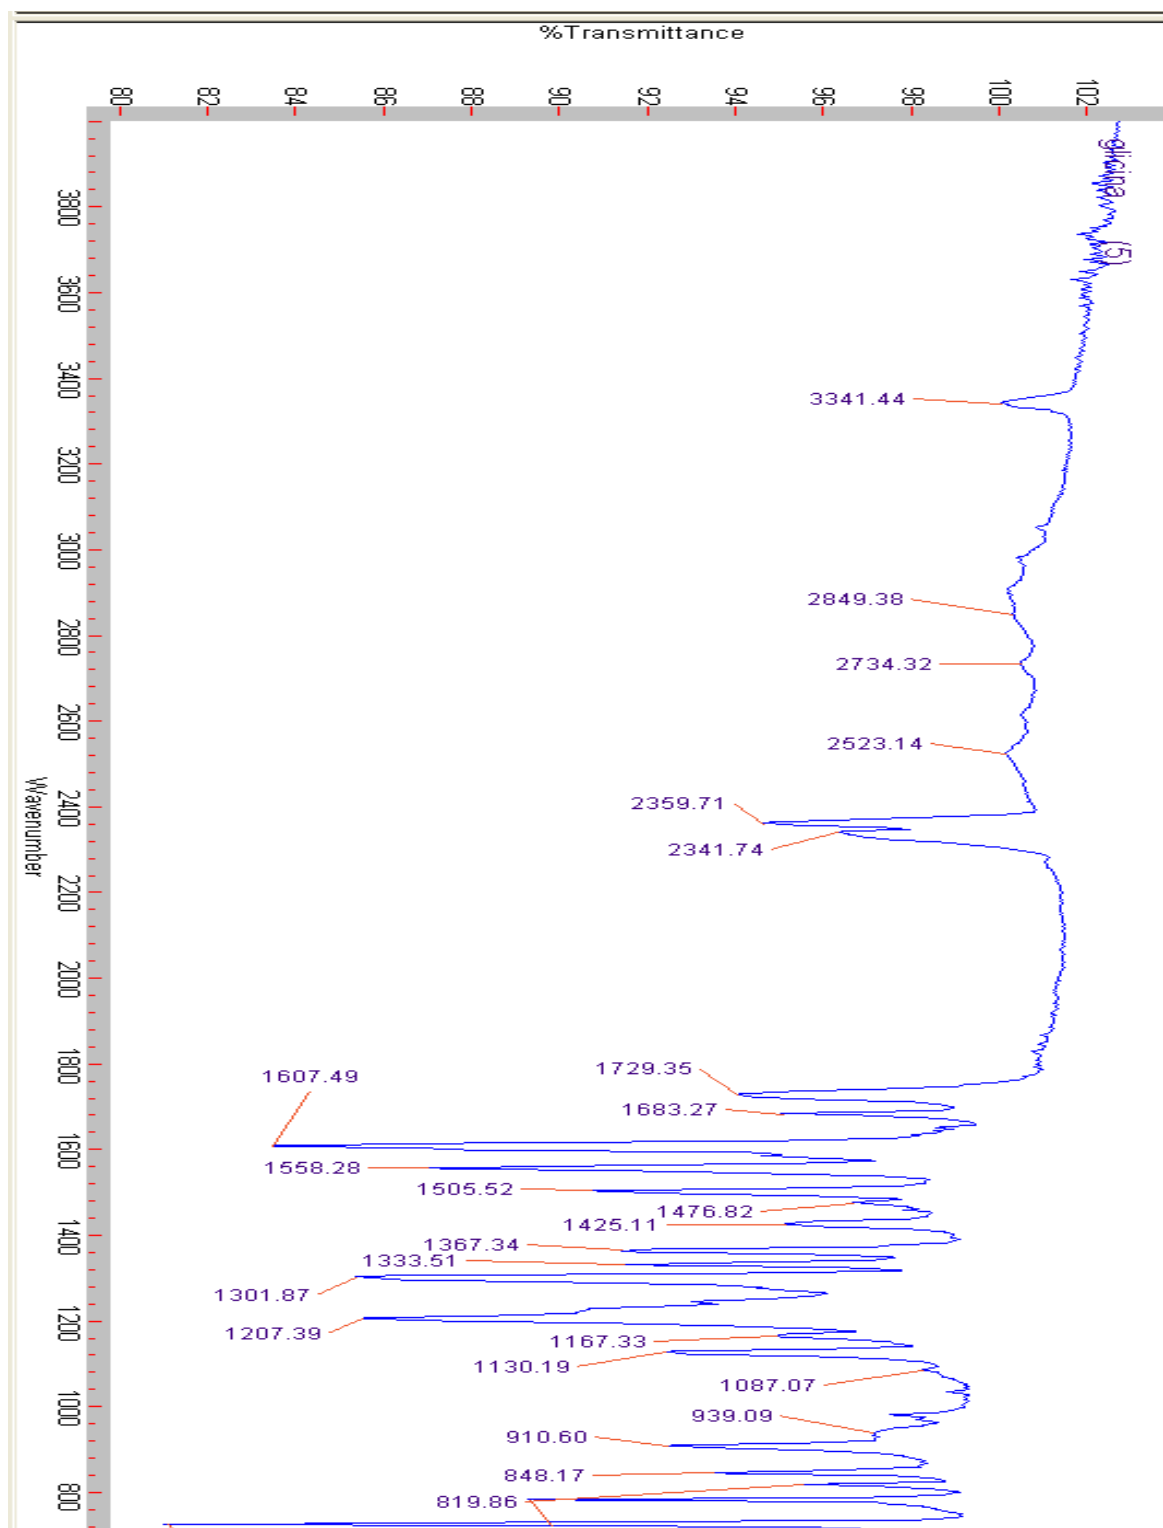

**Figure S2.**  $^1\text{H-NMR}$  ( $\delta$ ,  $\text{DMSO-}d_6$ , 300 MHz) and expansion of **2**.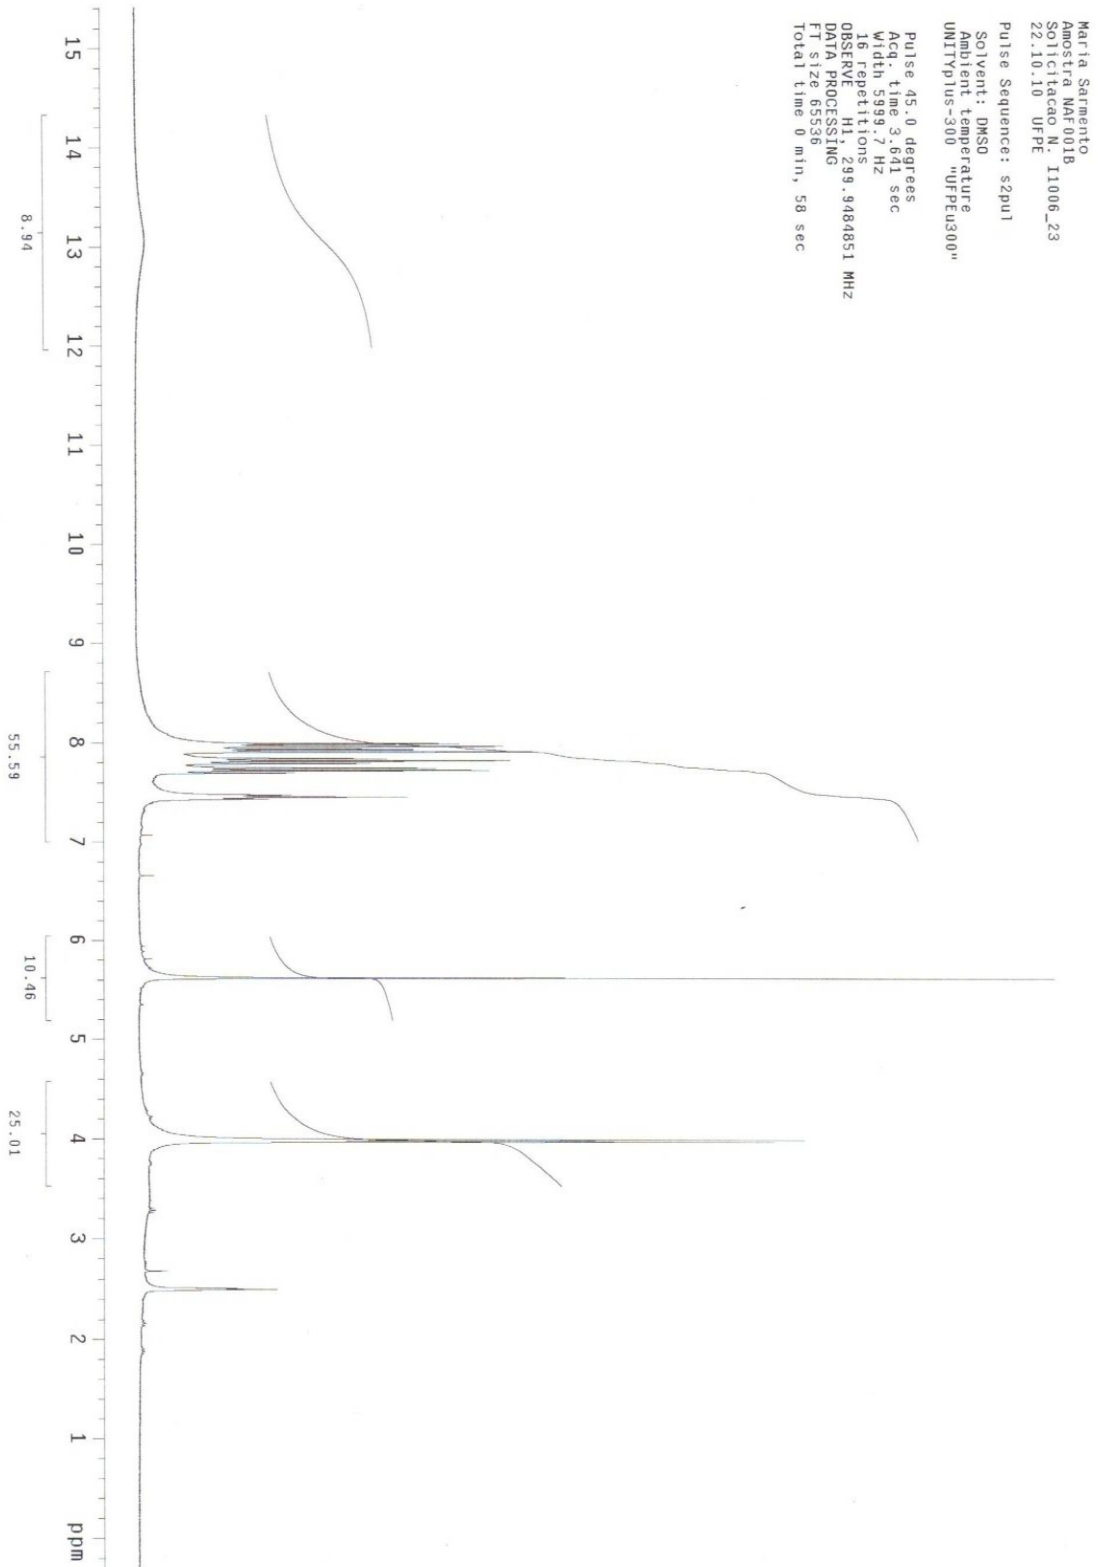

Figure S2. Cont.

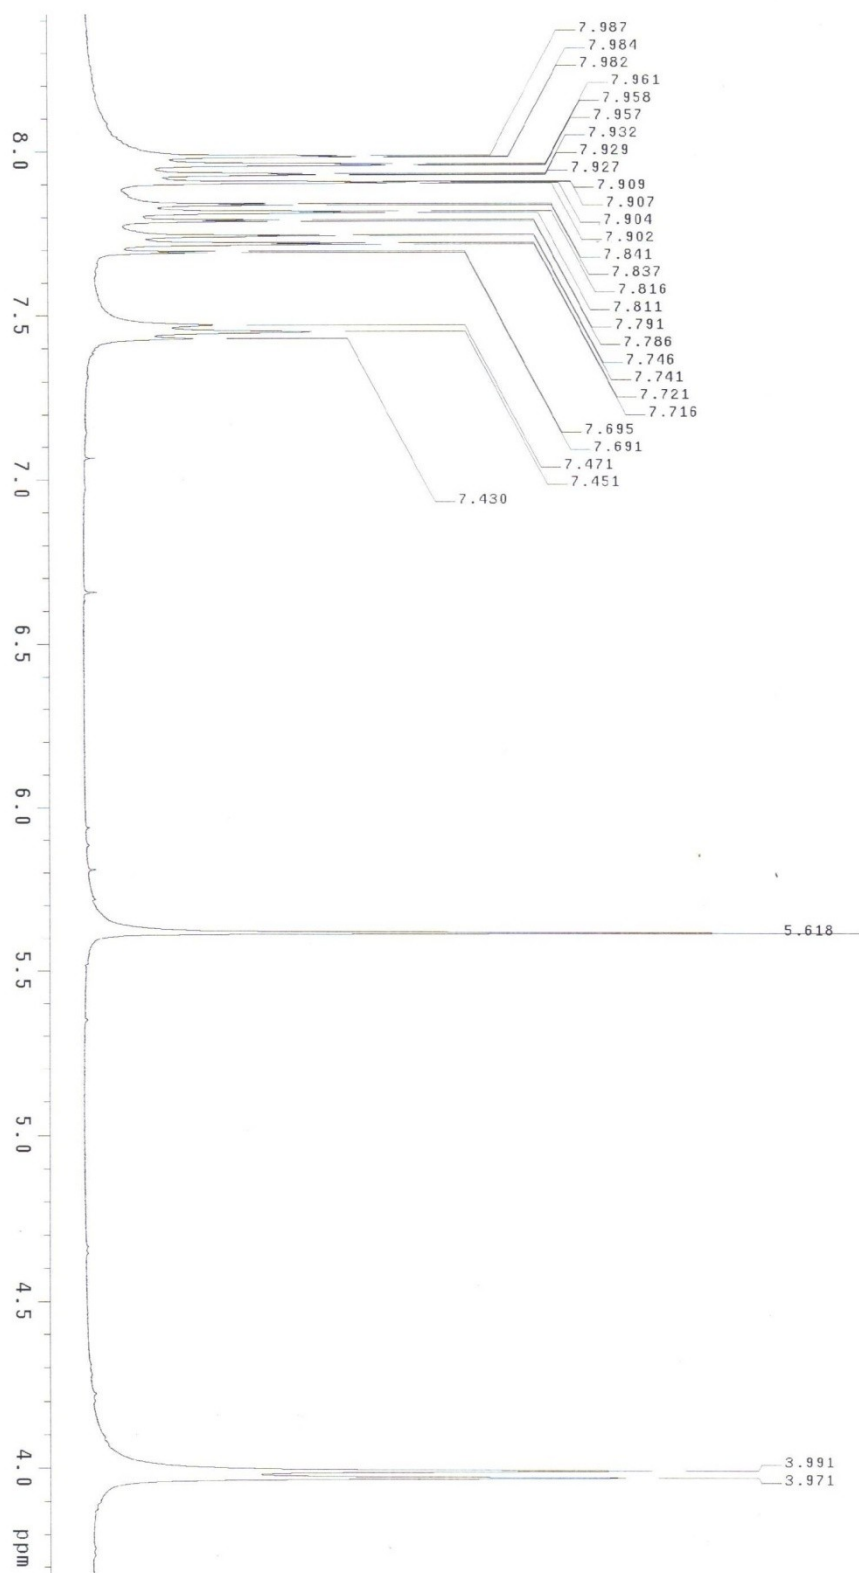

Figure S3.  $^{13}\text{C}$  NMR of (DMSO- $d_6$ , 75 MHz) of **2**.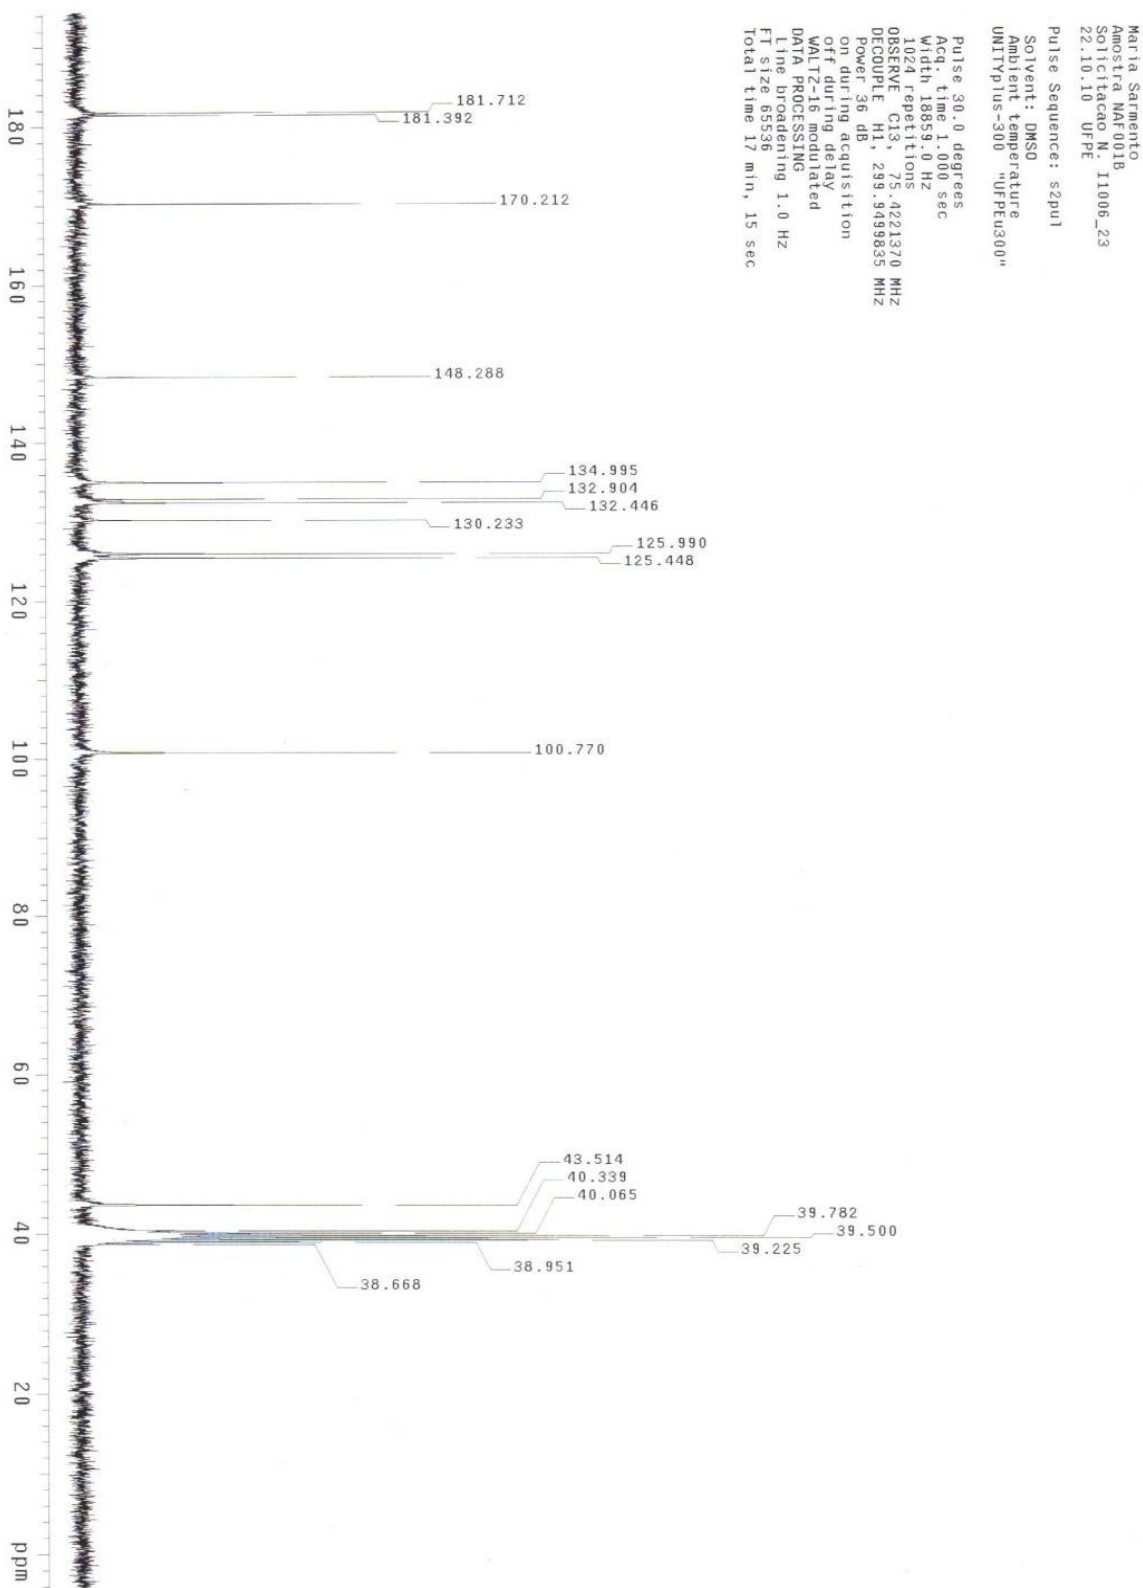

Figure S4. IR (ATR,  $\text{cm}^{-1}$ ) of compound 3.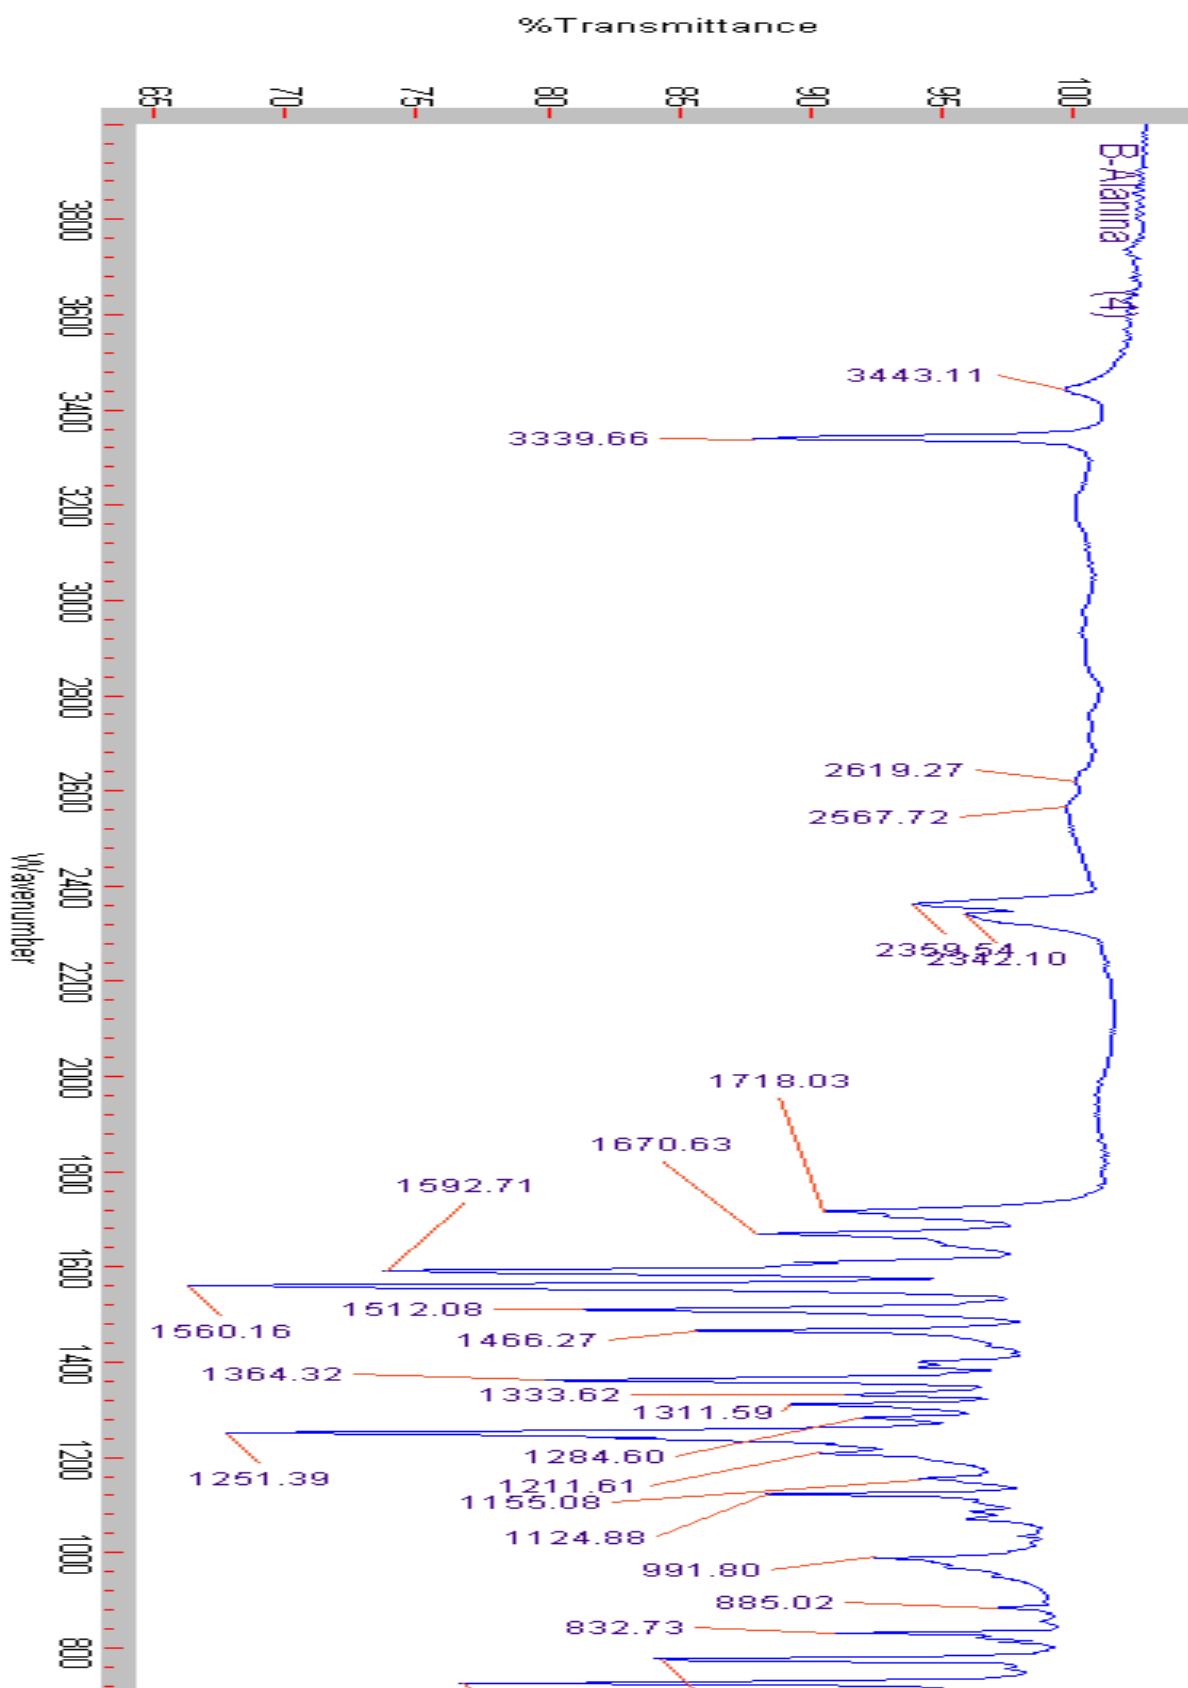

**Figure S5.**  $^1\text{H}$  NMR (DMSO- $d_6$ , 300 MHz) of **3**.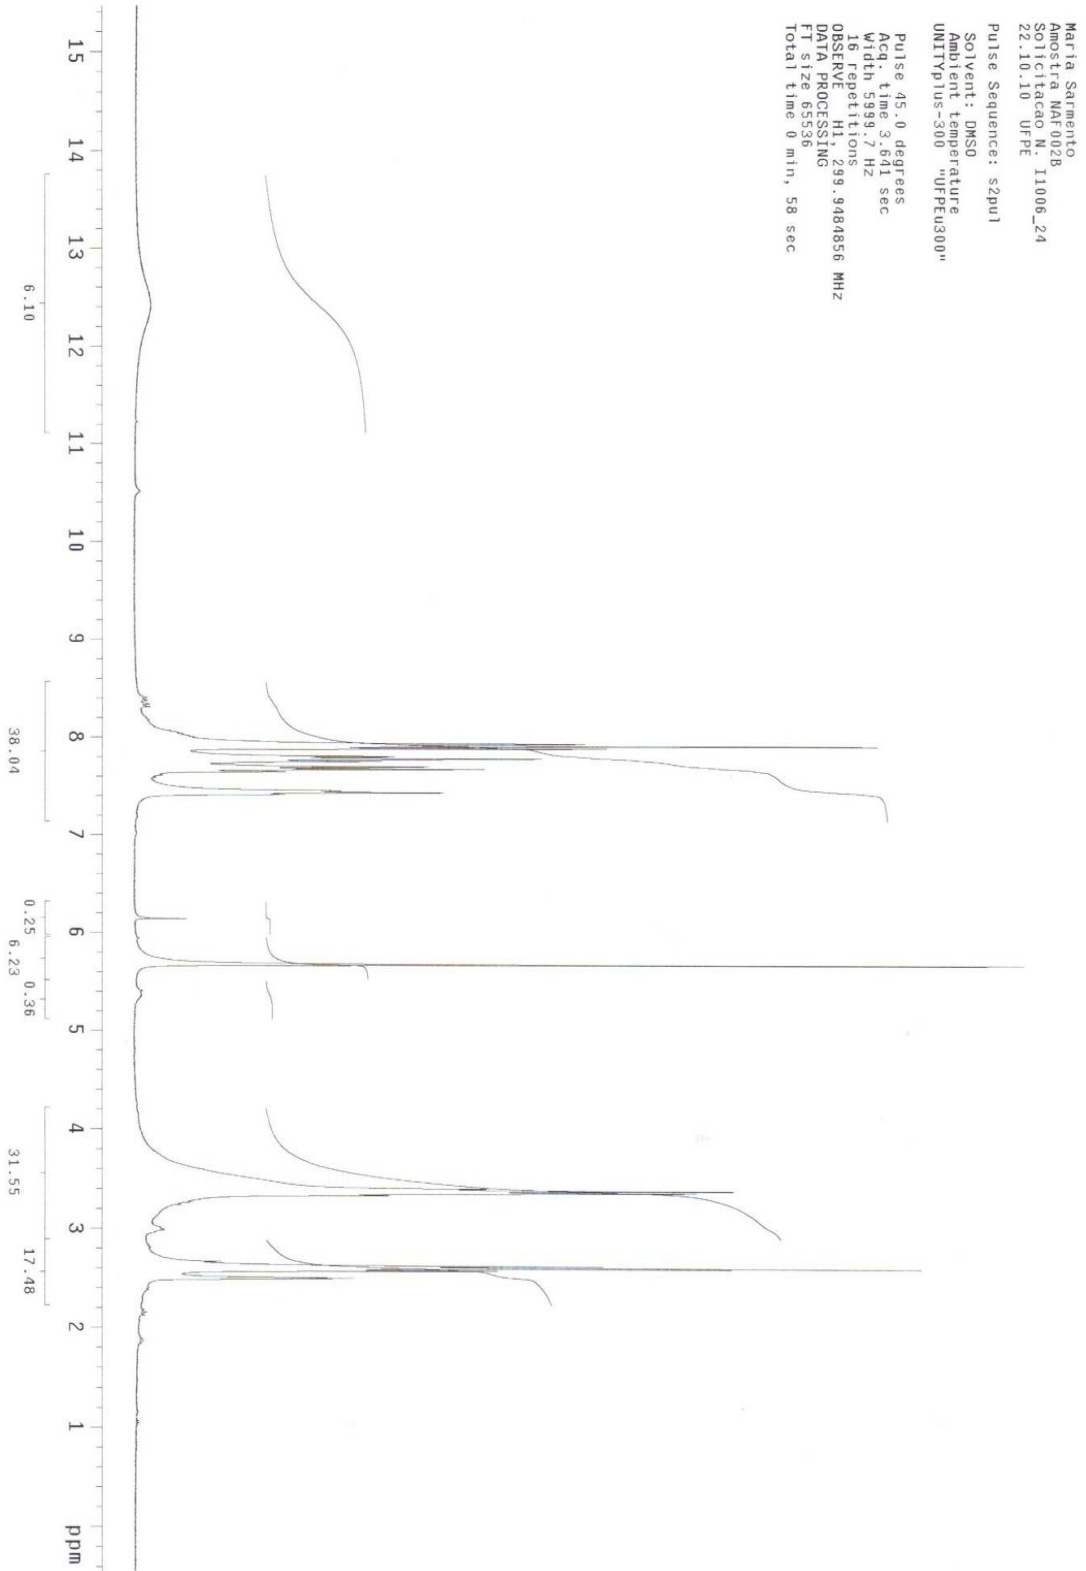

Figure S5. Cont.

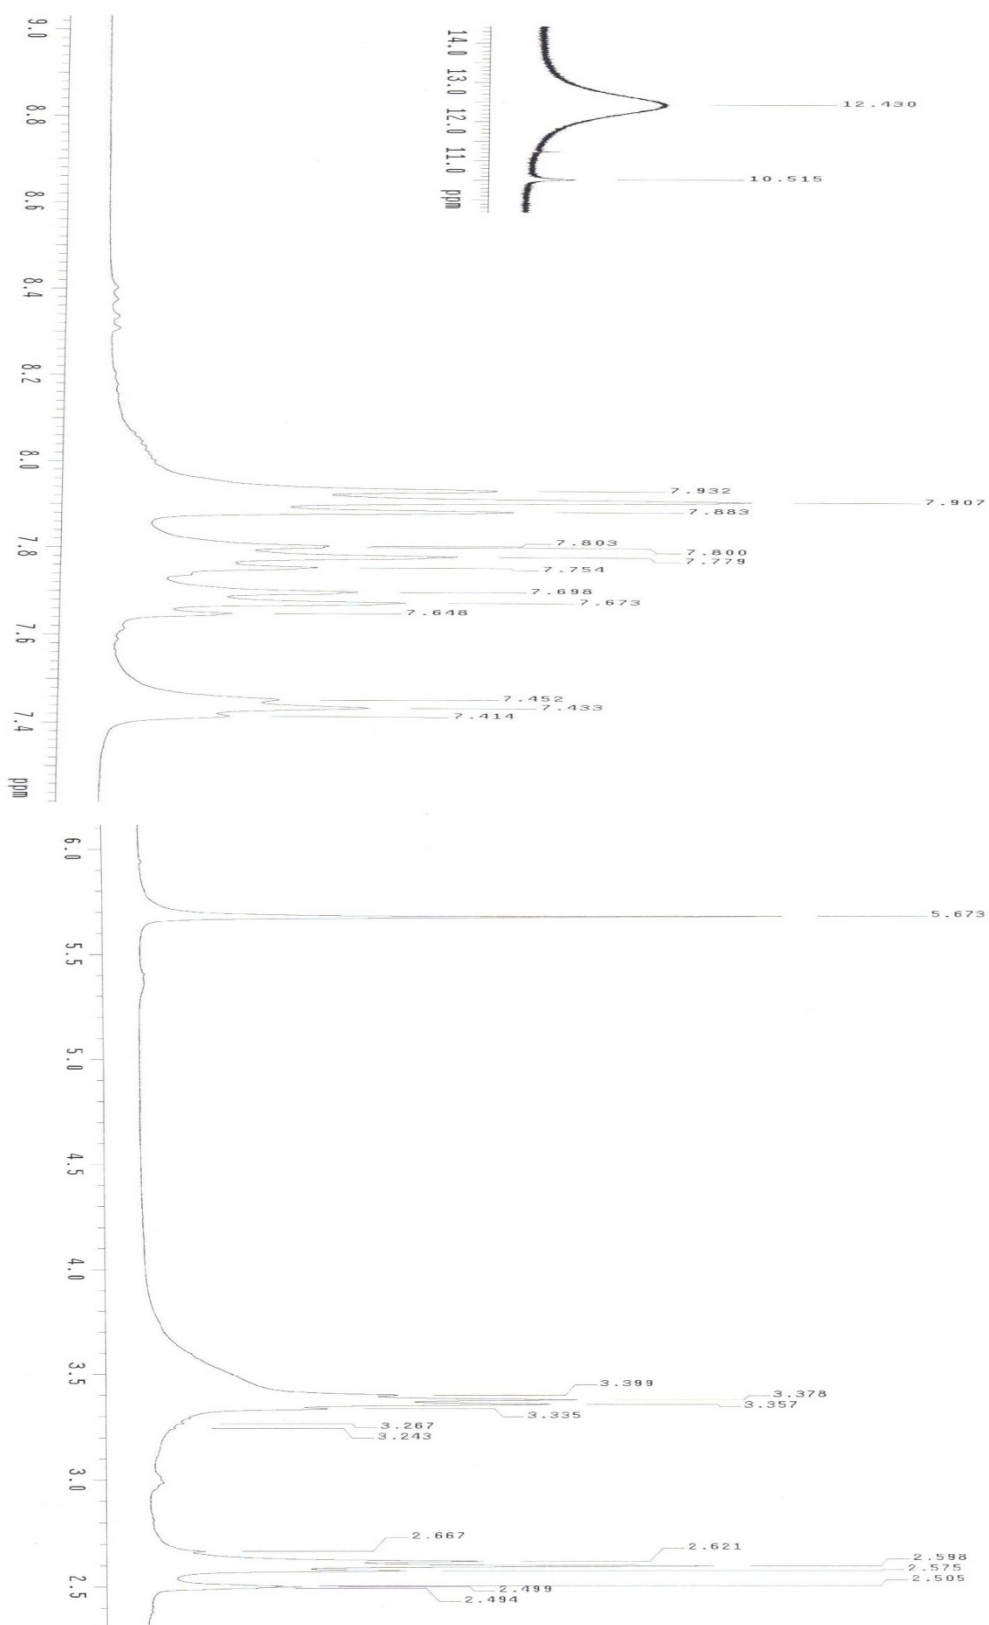

**Figure S6.**  $^{13}\text{C}$  NMR (DMSO- $d_6$ , 75 MHz) and expansion of **3**.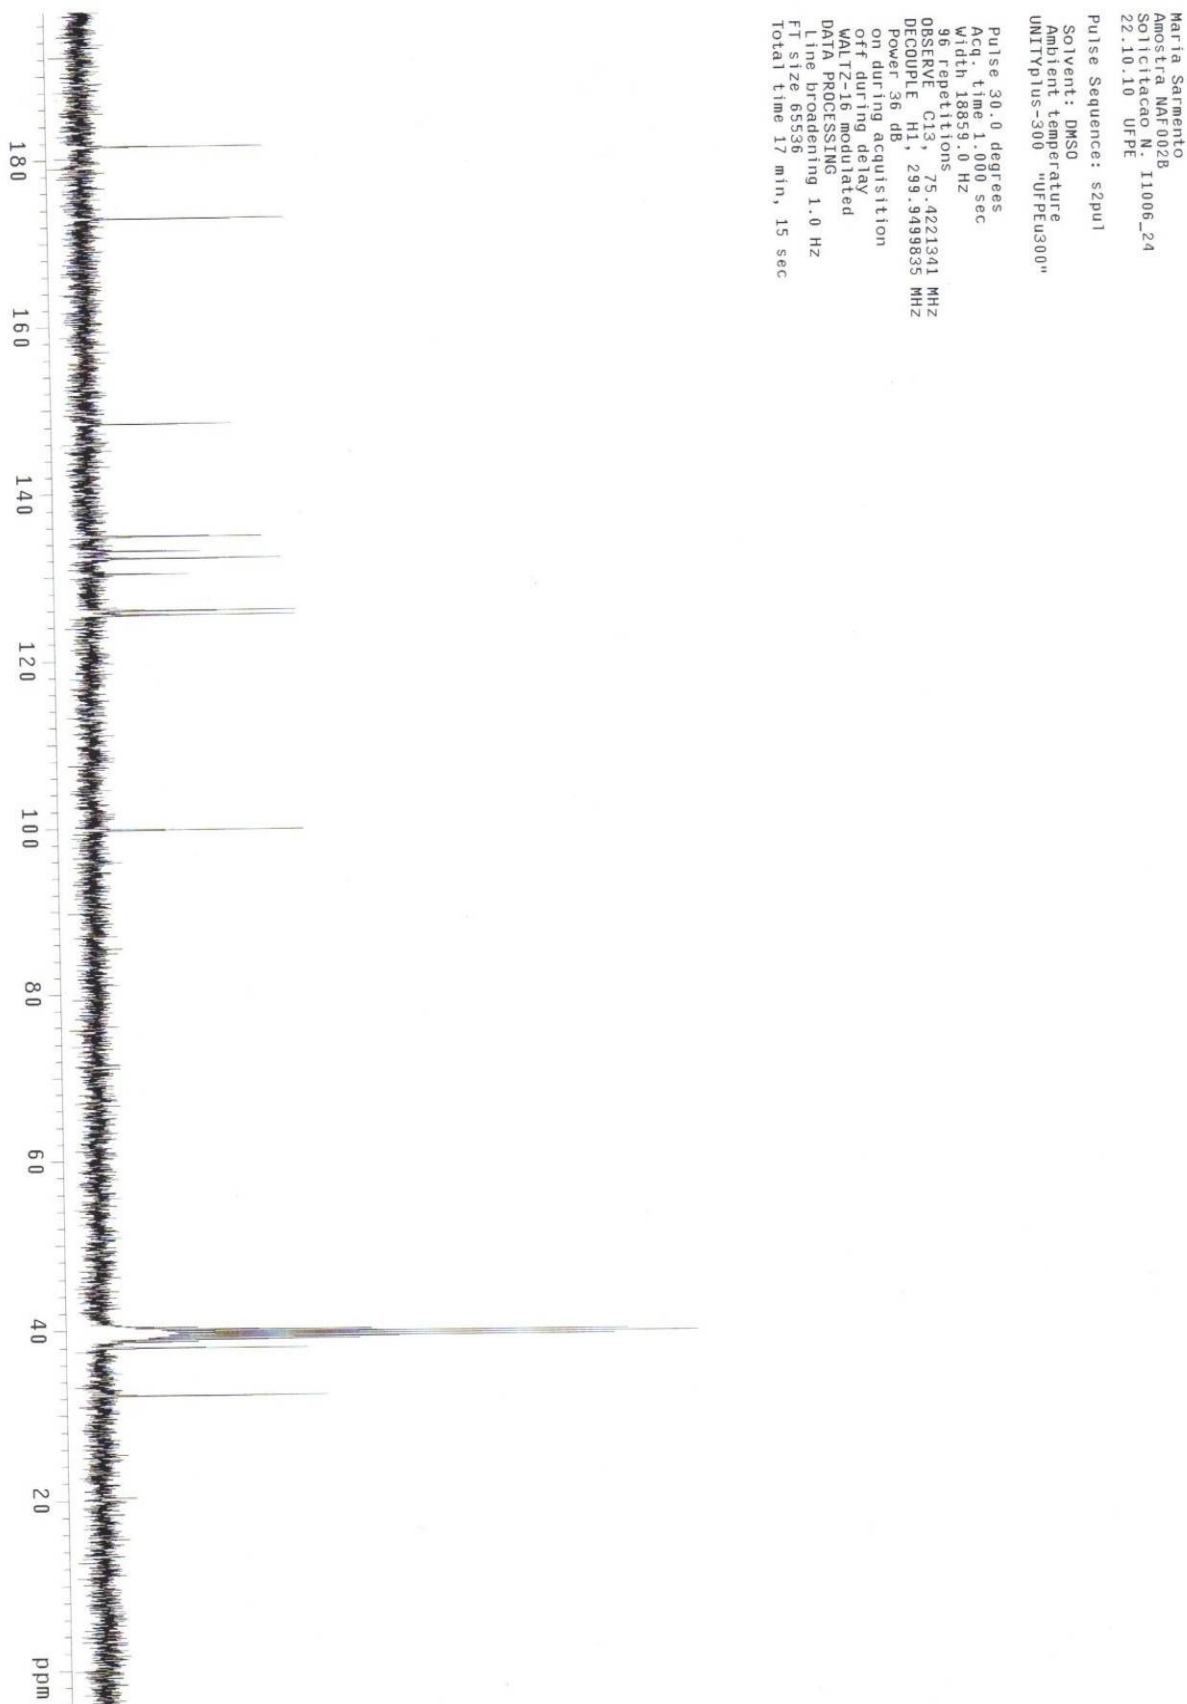



Figure S6. *Cont.*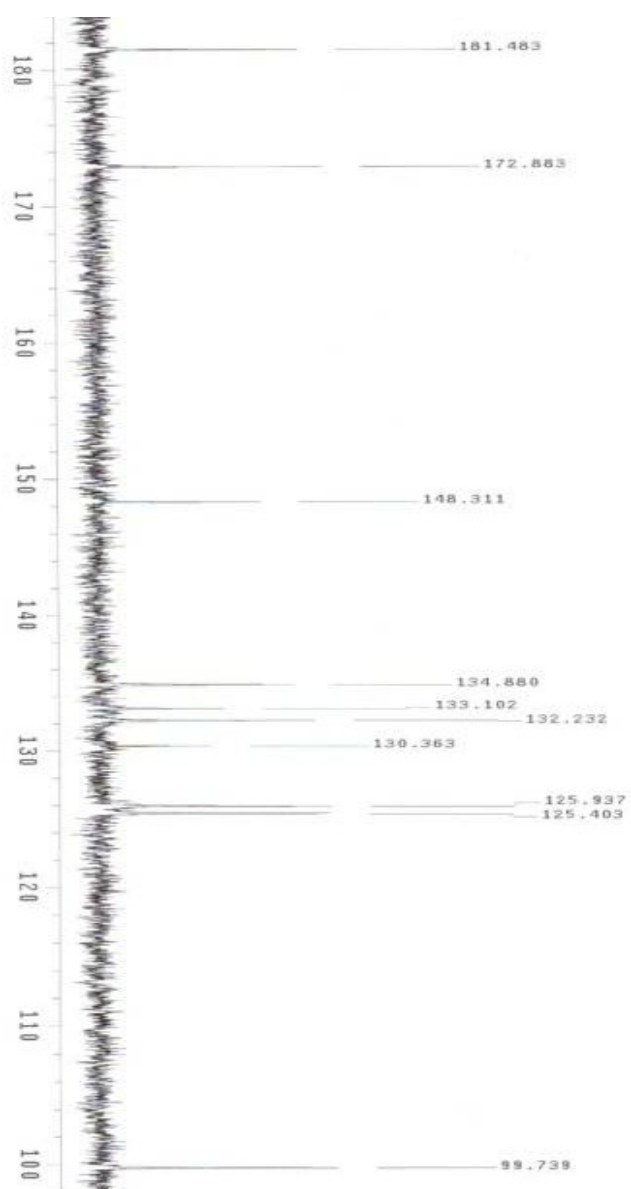

Figure S7. IR (ATR) of 4.

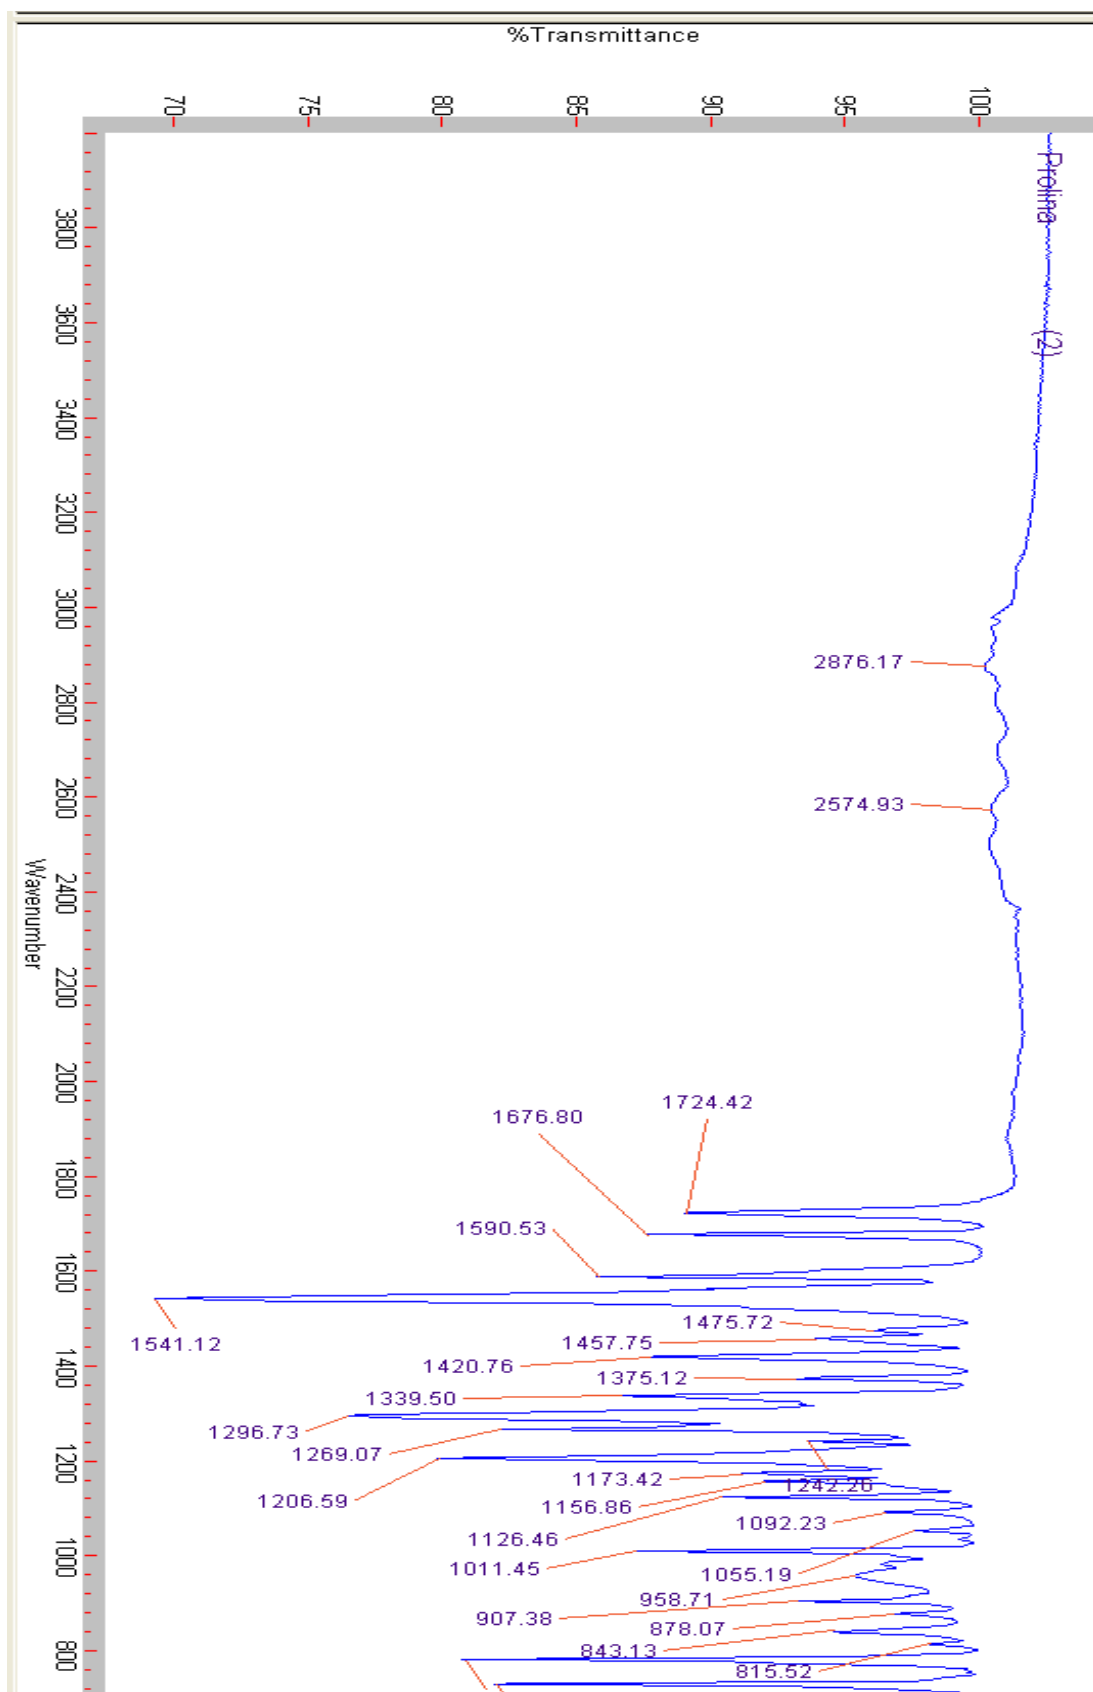

**Figure S8.**  $^1\text{H}$  NMR (DMSO- $d_6$ , 400 MHz) and expansions of **4**.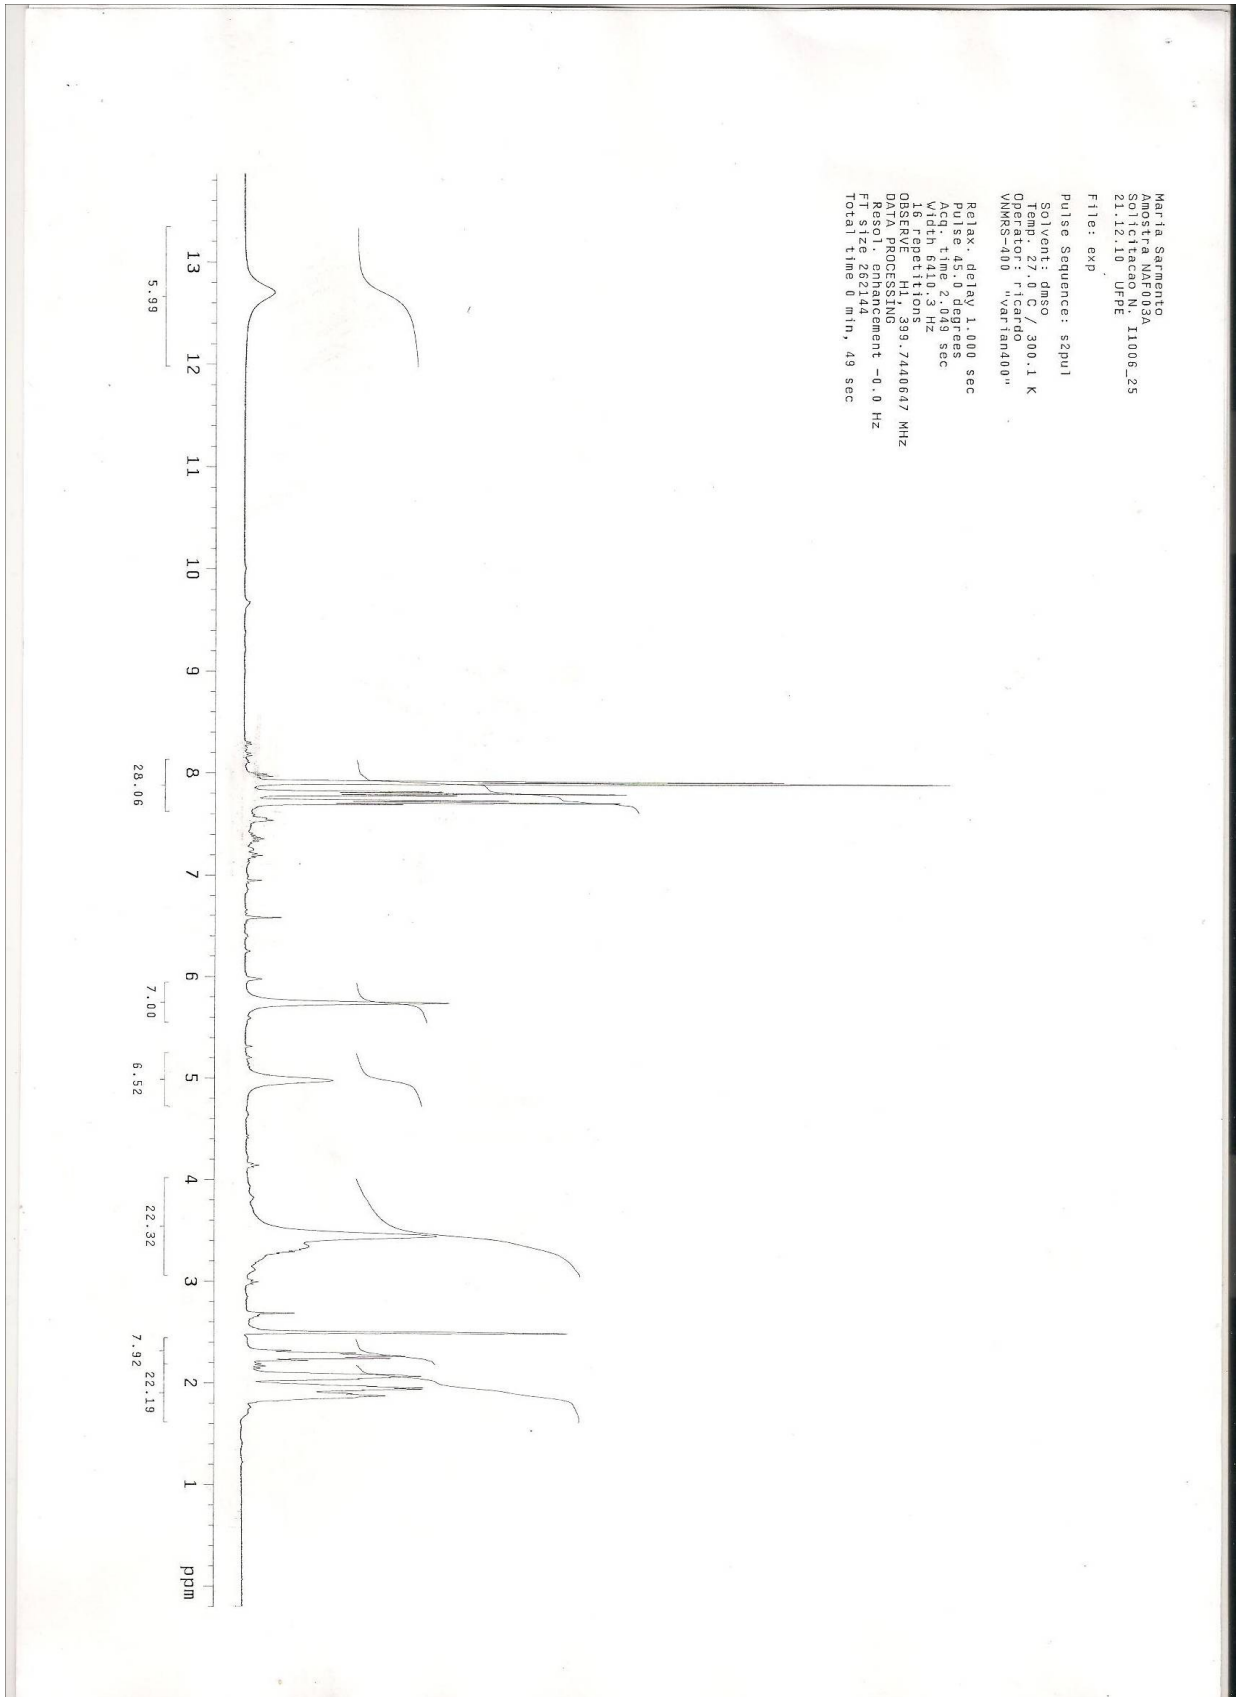

Figure S8. Cont.

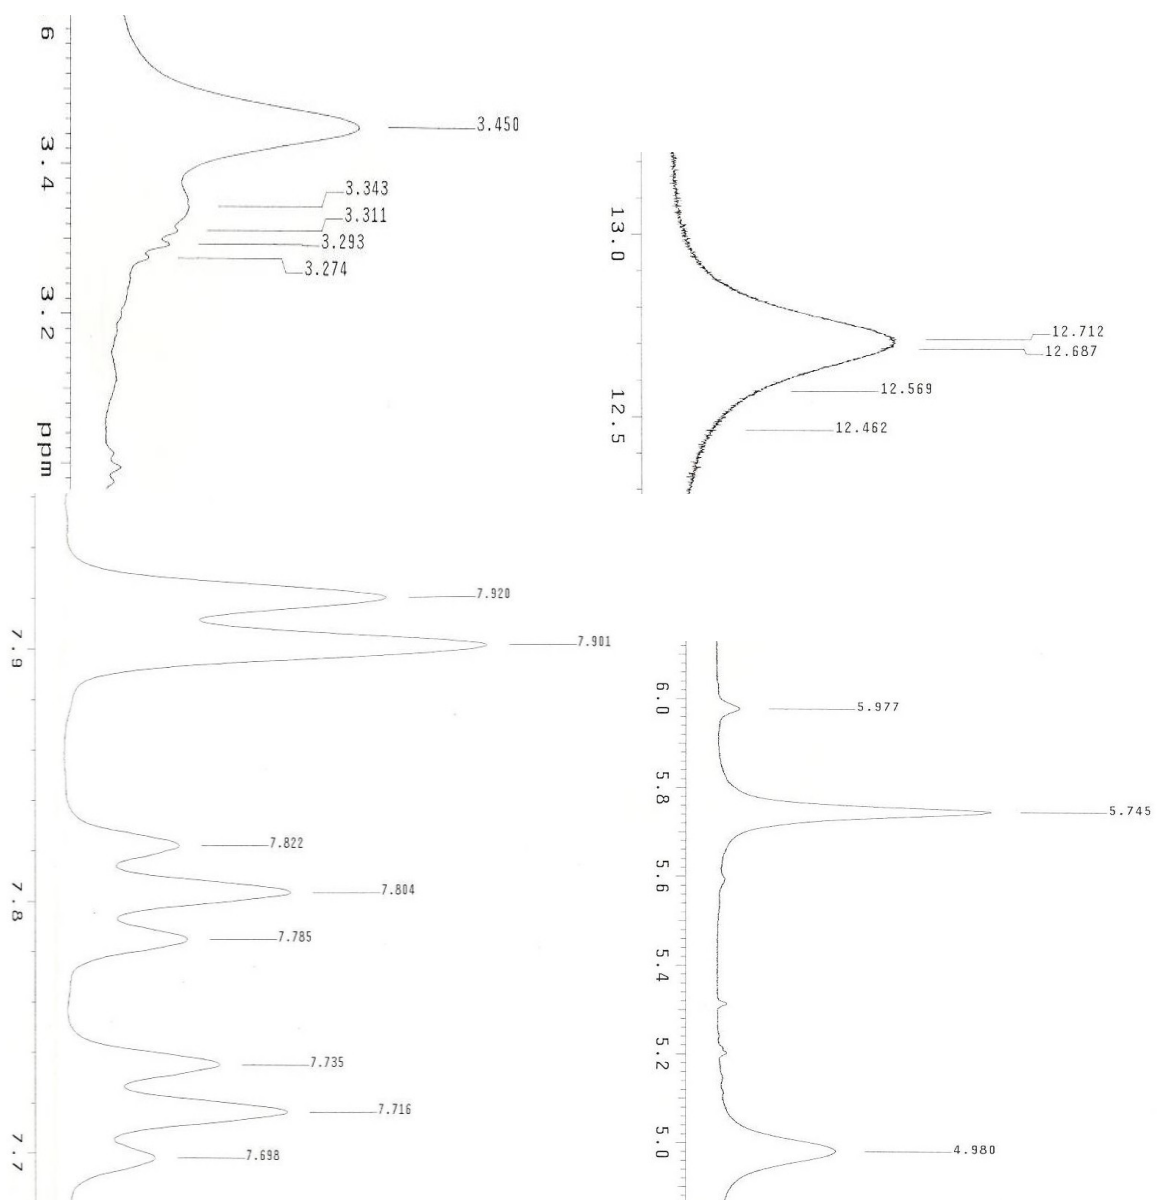

Figure S8. Cont.

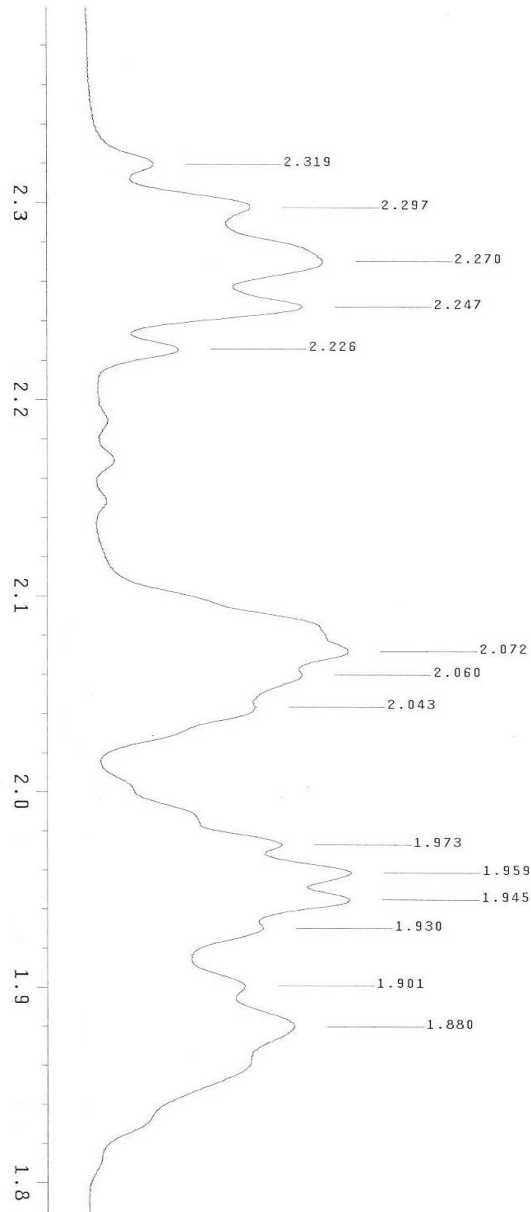

**Figure S9.**  $^{13}\text{C}$  NMR (100 MHz,  $\text{DMSO-}d_6$ ) and expansions of **4**.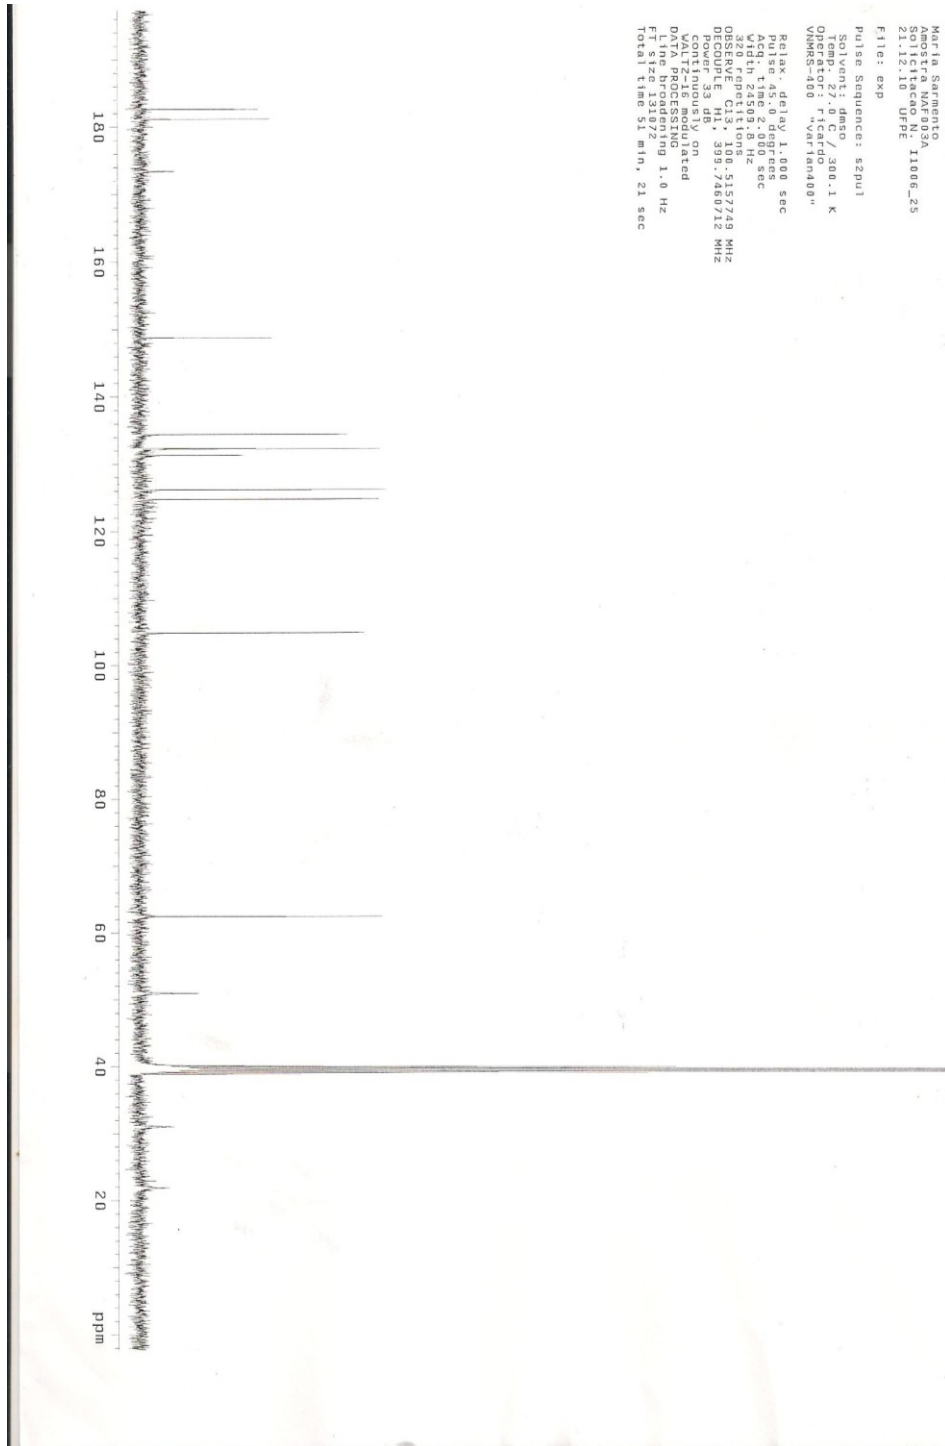

Figure S9. Cont.

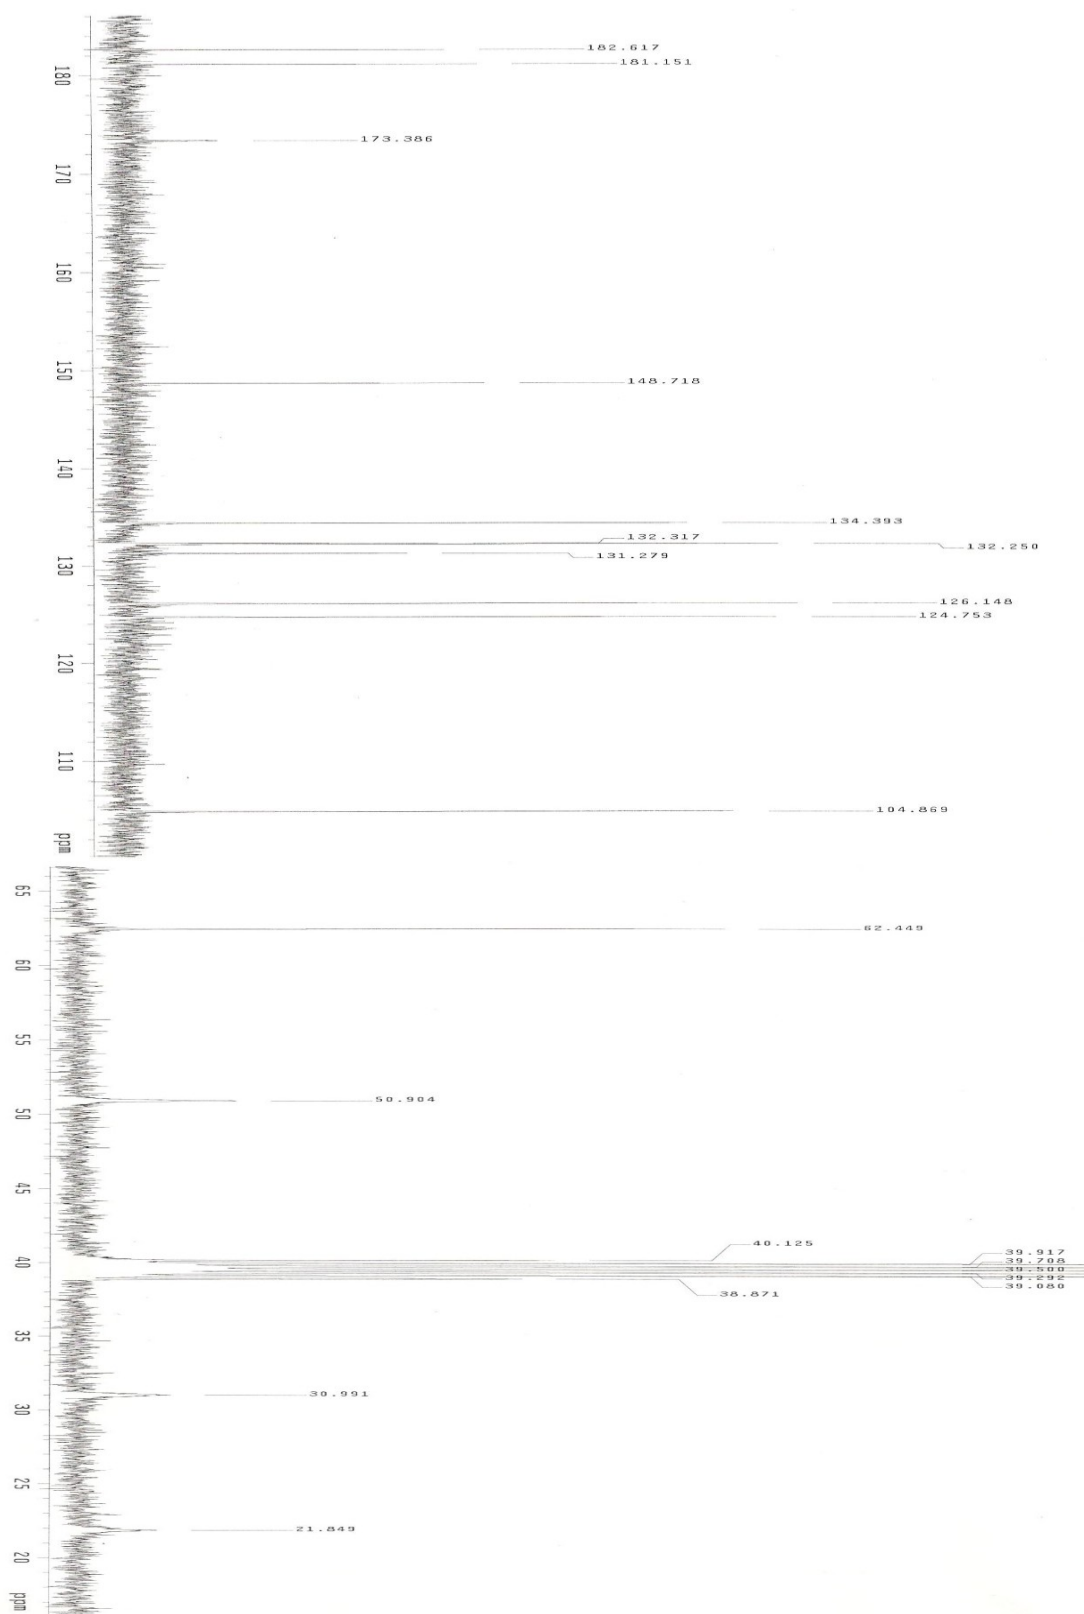

Figure S10. IR (ATR) of 5.

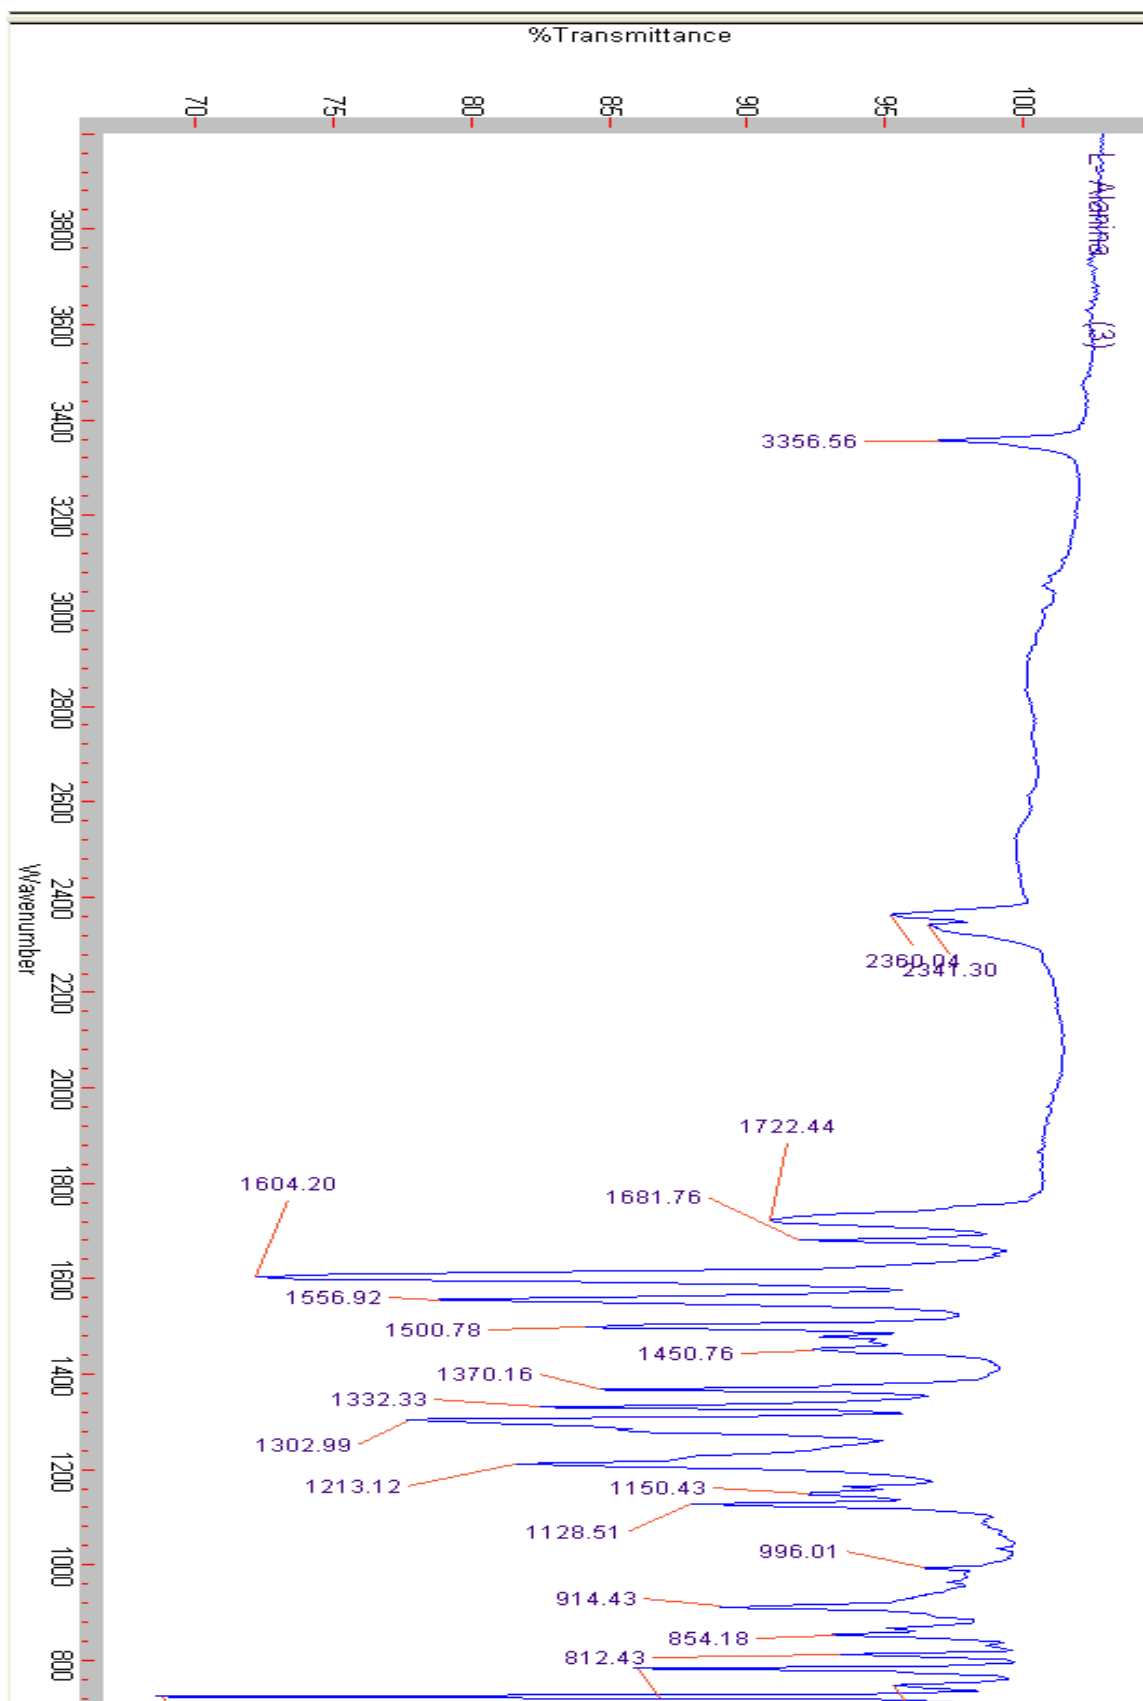



**Figure S11.**  $^1\text{H}$  NMR (300 MHz,  $\text{DMSO-}d_6$ ) and expansion of **5**.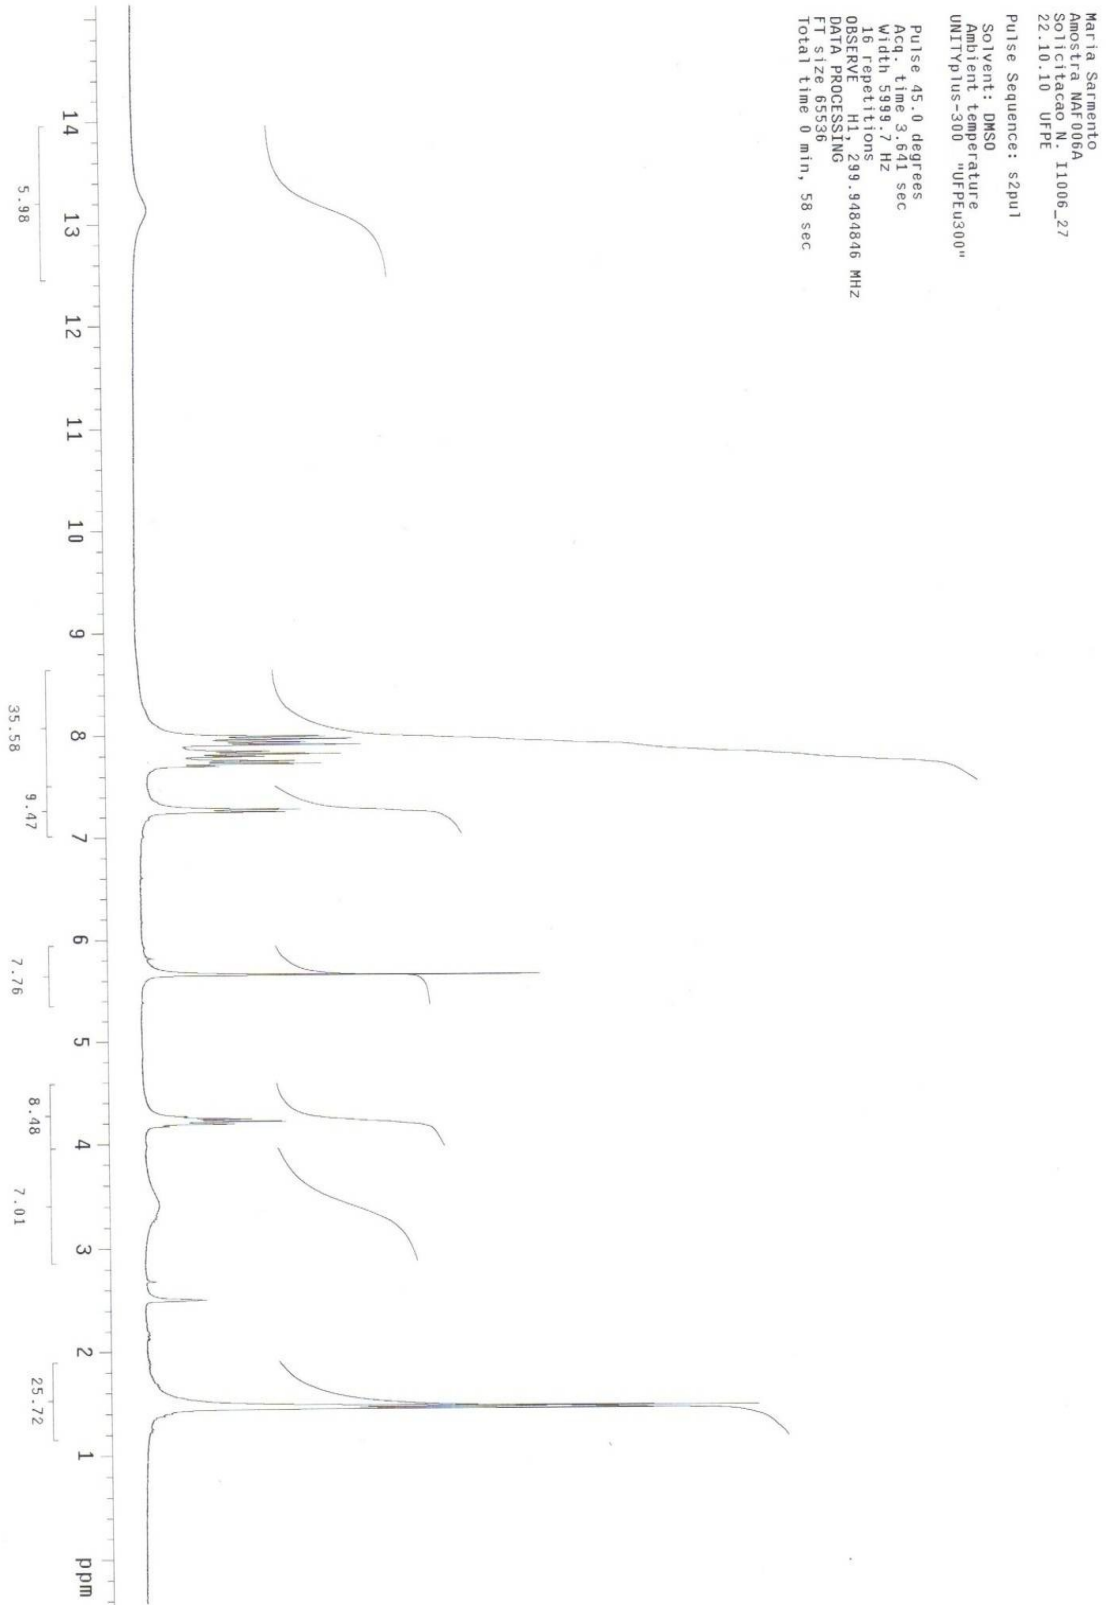

Figure S11. Cont.

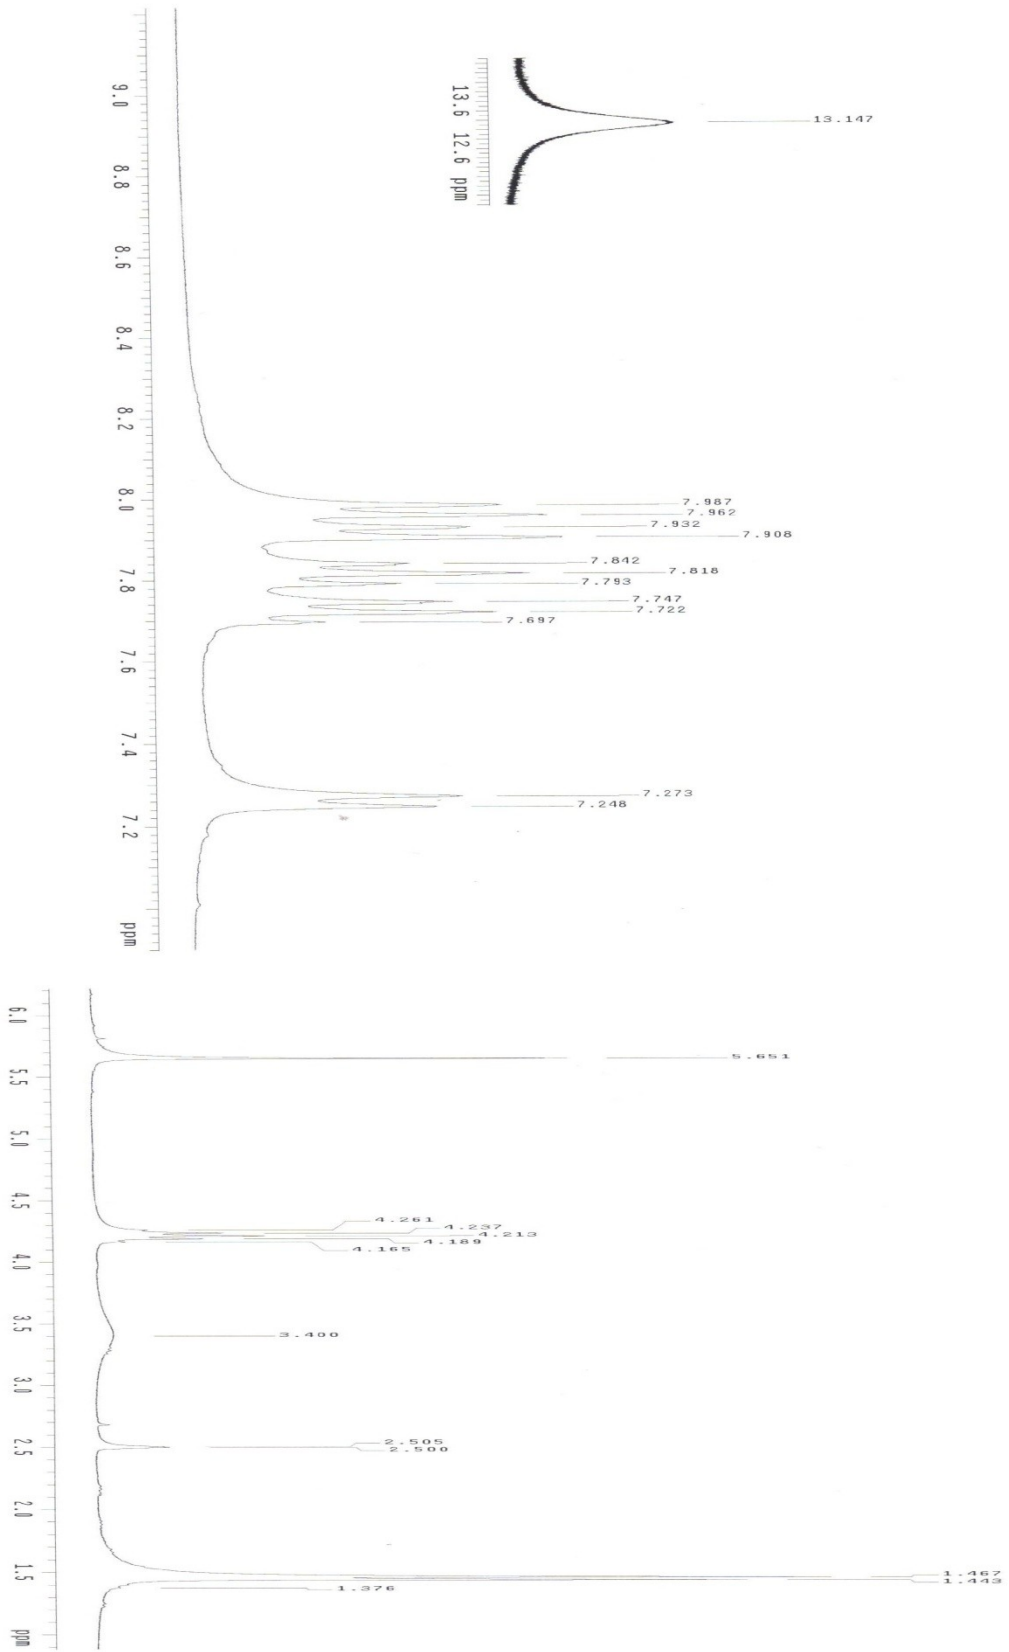

Figure S12.  $^{13}\text{C}$  NMR (75 MHz,  $\text{DMSO-}d_6$ ) and expansions of **5**.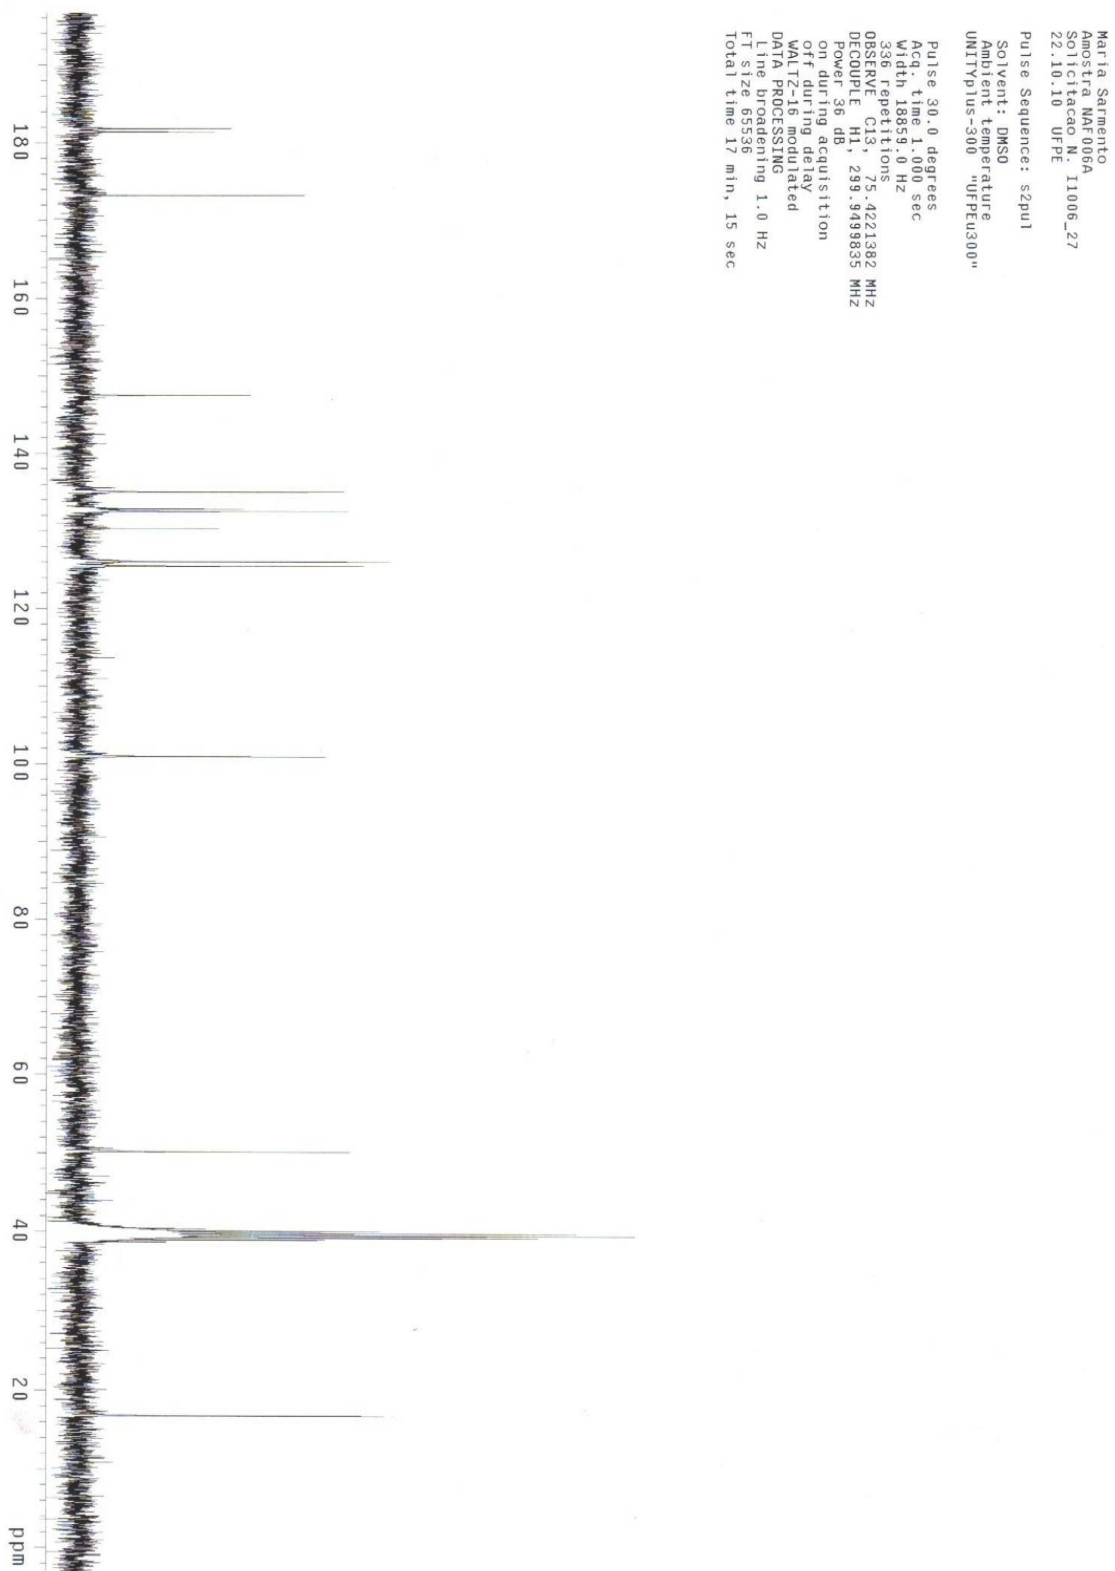

Figure S12. Cont.

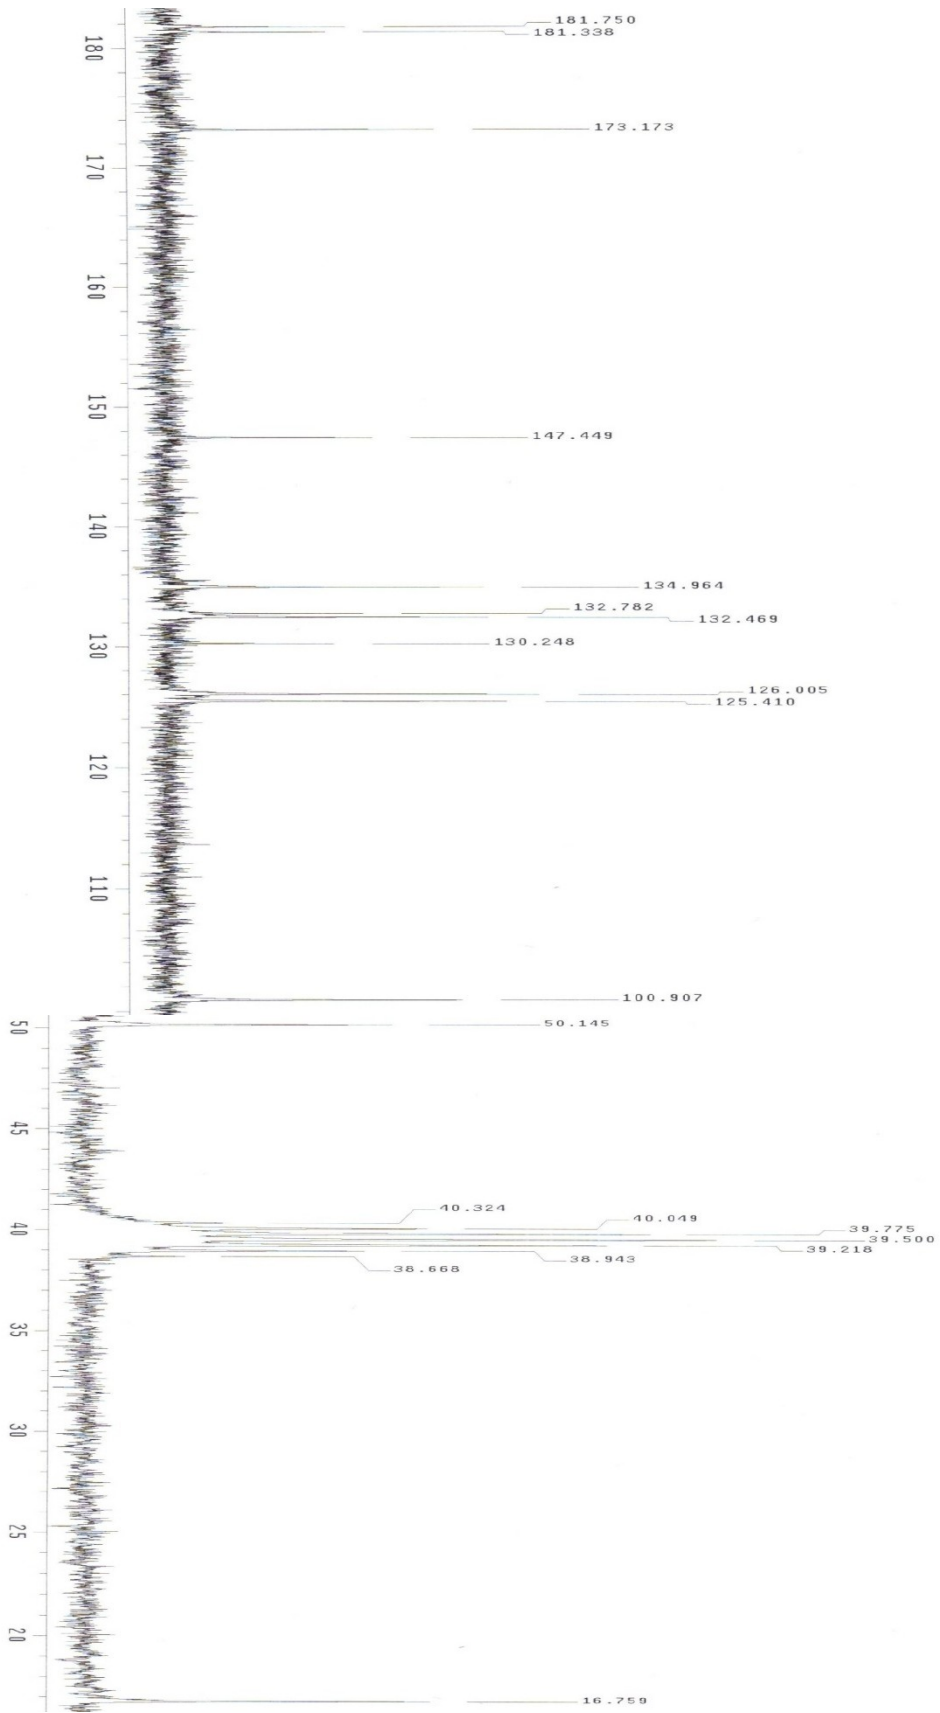

Figure S13. IR (KBr,  $\text{cm}^{-1}$ ) of 6.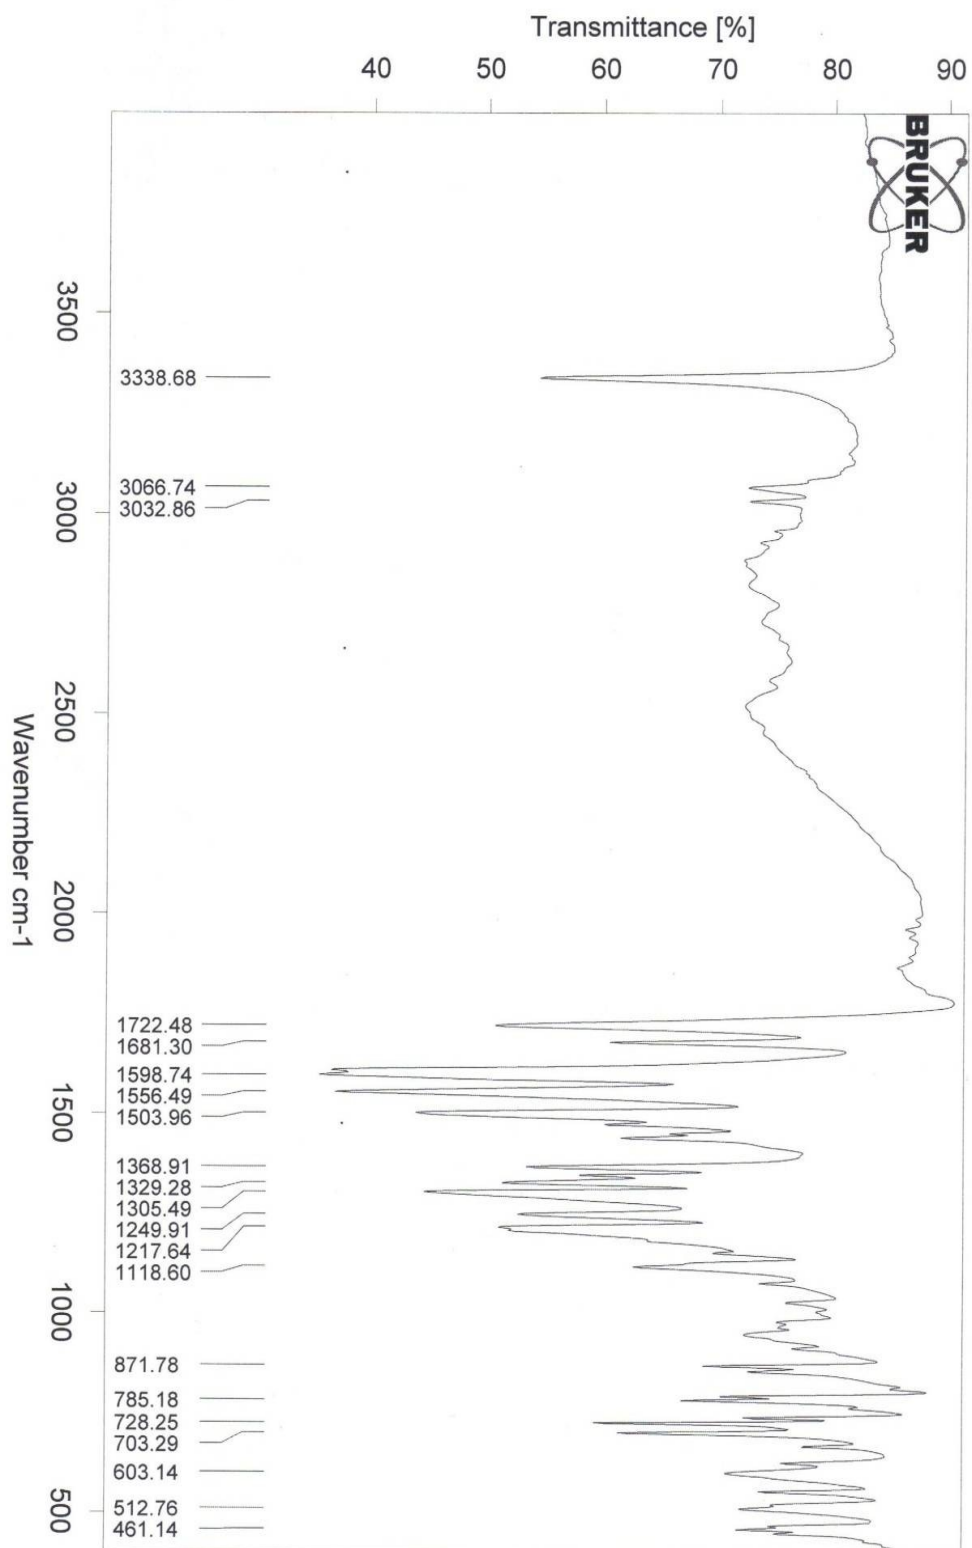

**Figure S14.**  $^1\text{H}$  NMR (400 MHz,  $\text{DMSO-}d_6$ ) and expansion of **6**.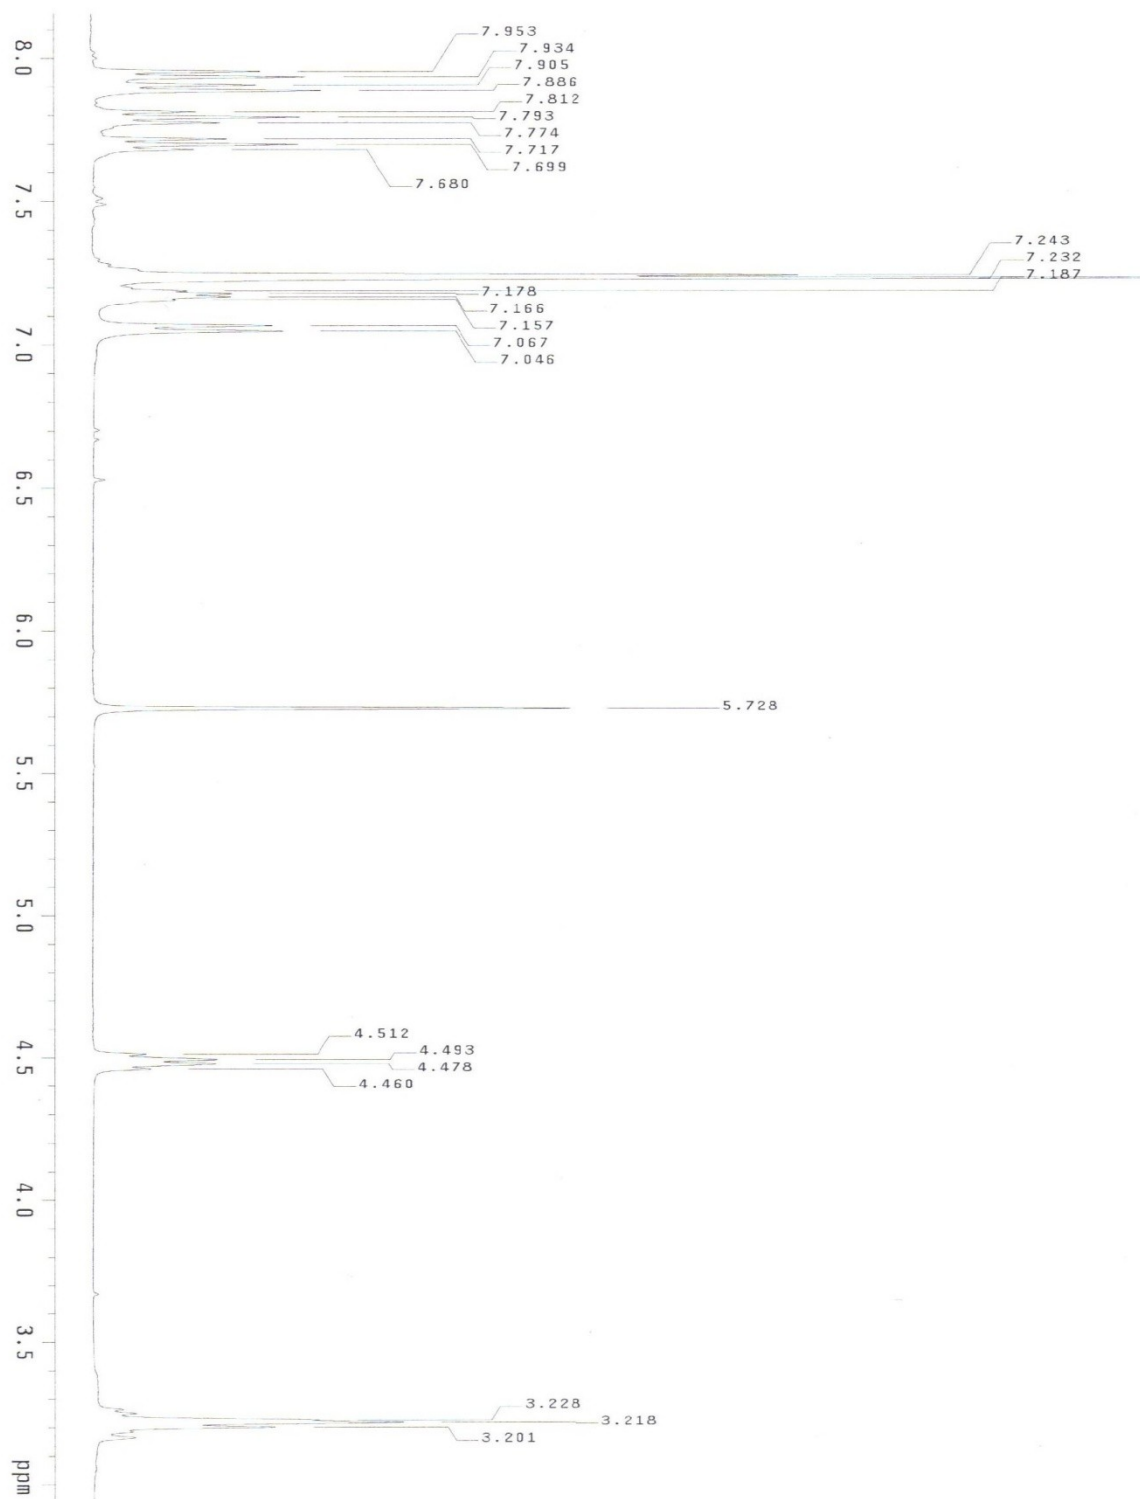

Figure S14. *Cont.*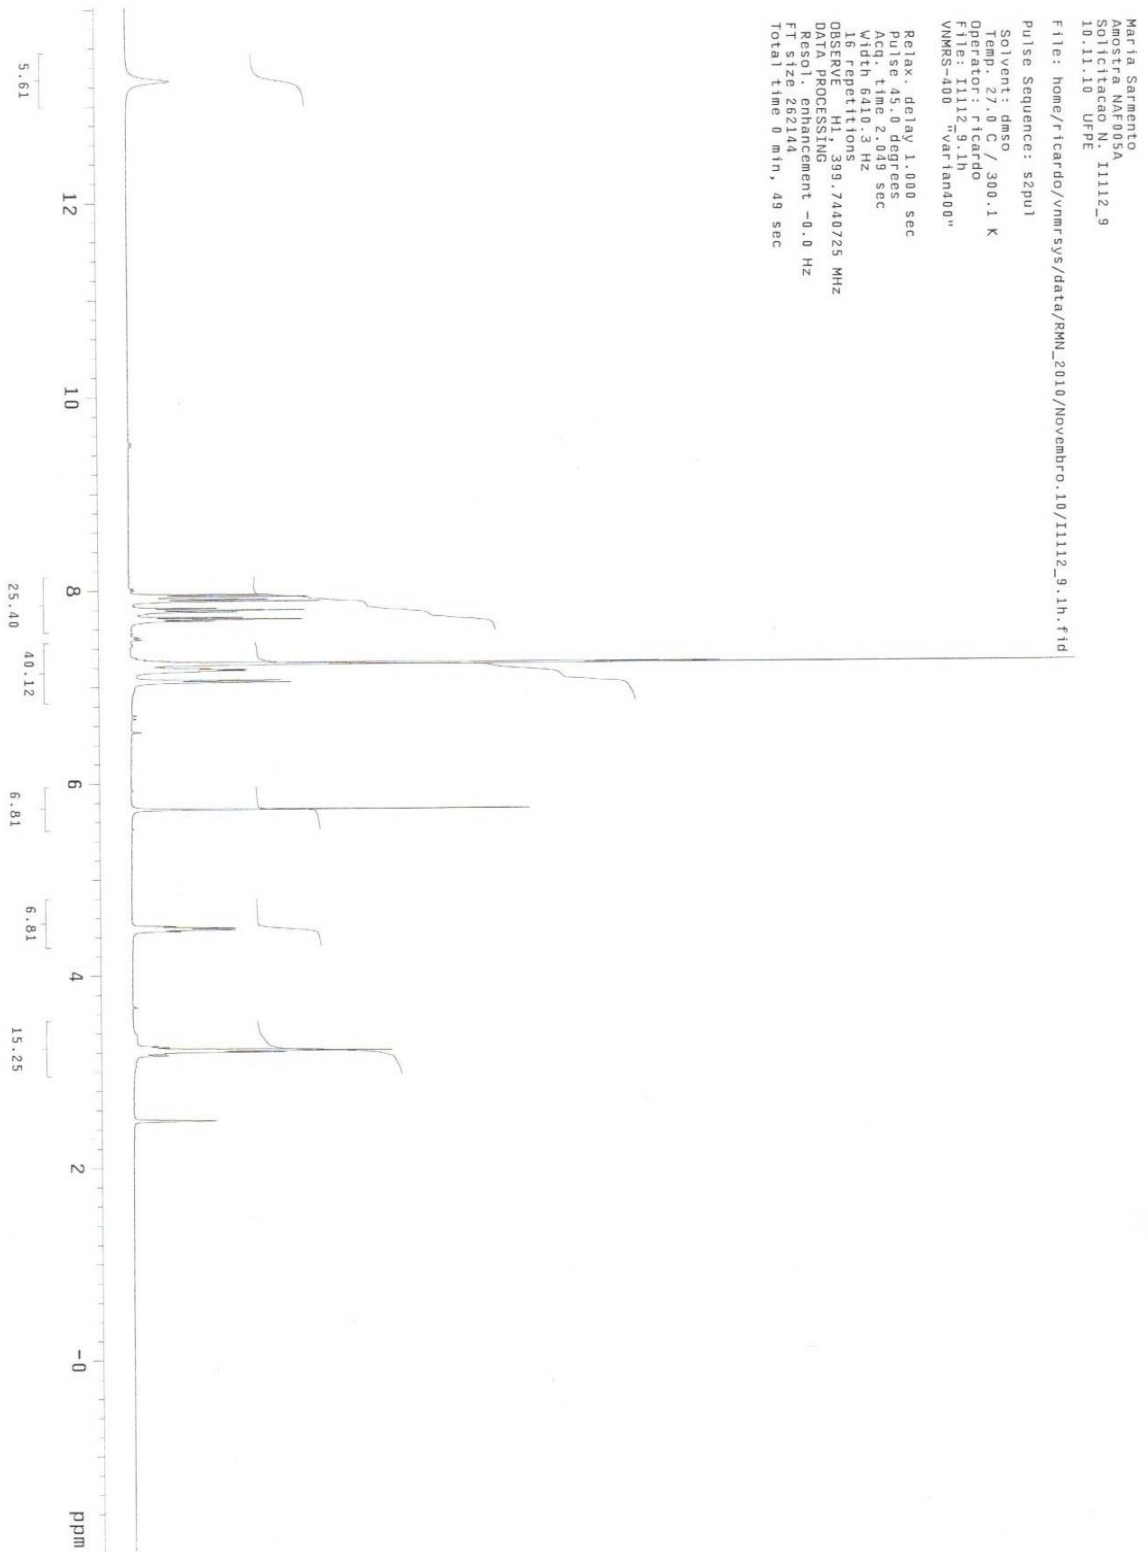

Figure S15.  $^{13}\text{C}$  NMR (100 MHz, DMSO- $d_6$ ) of 6.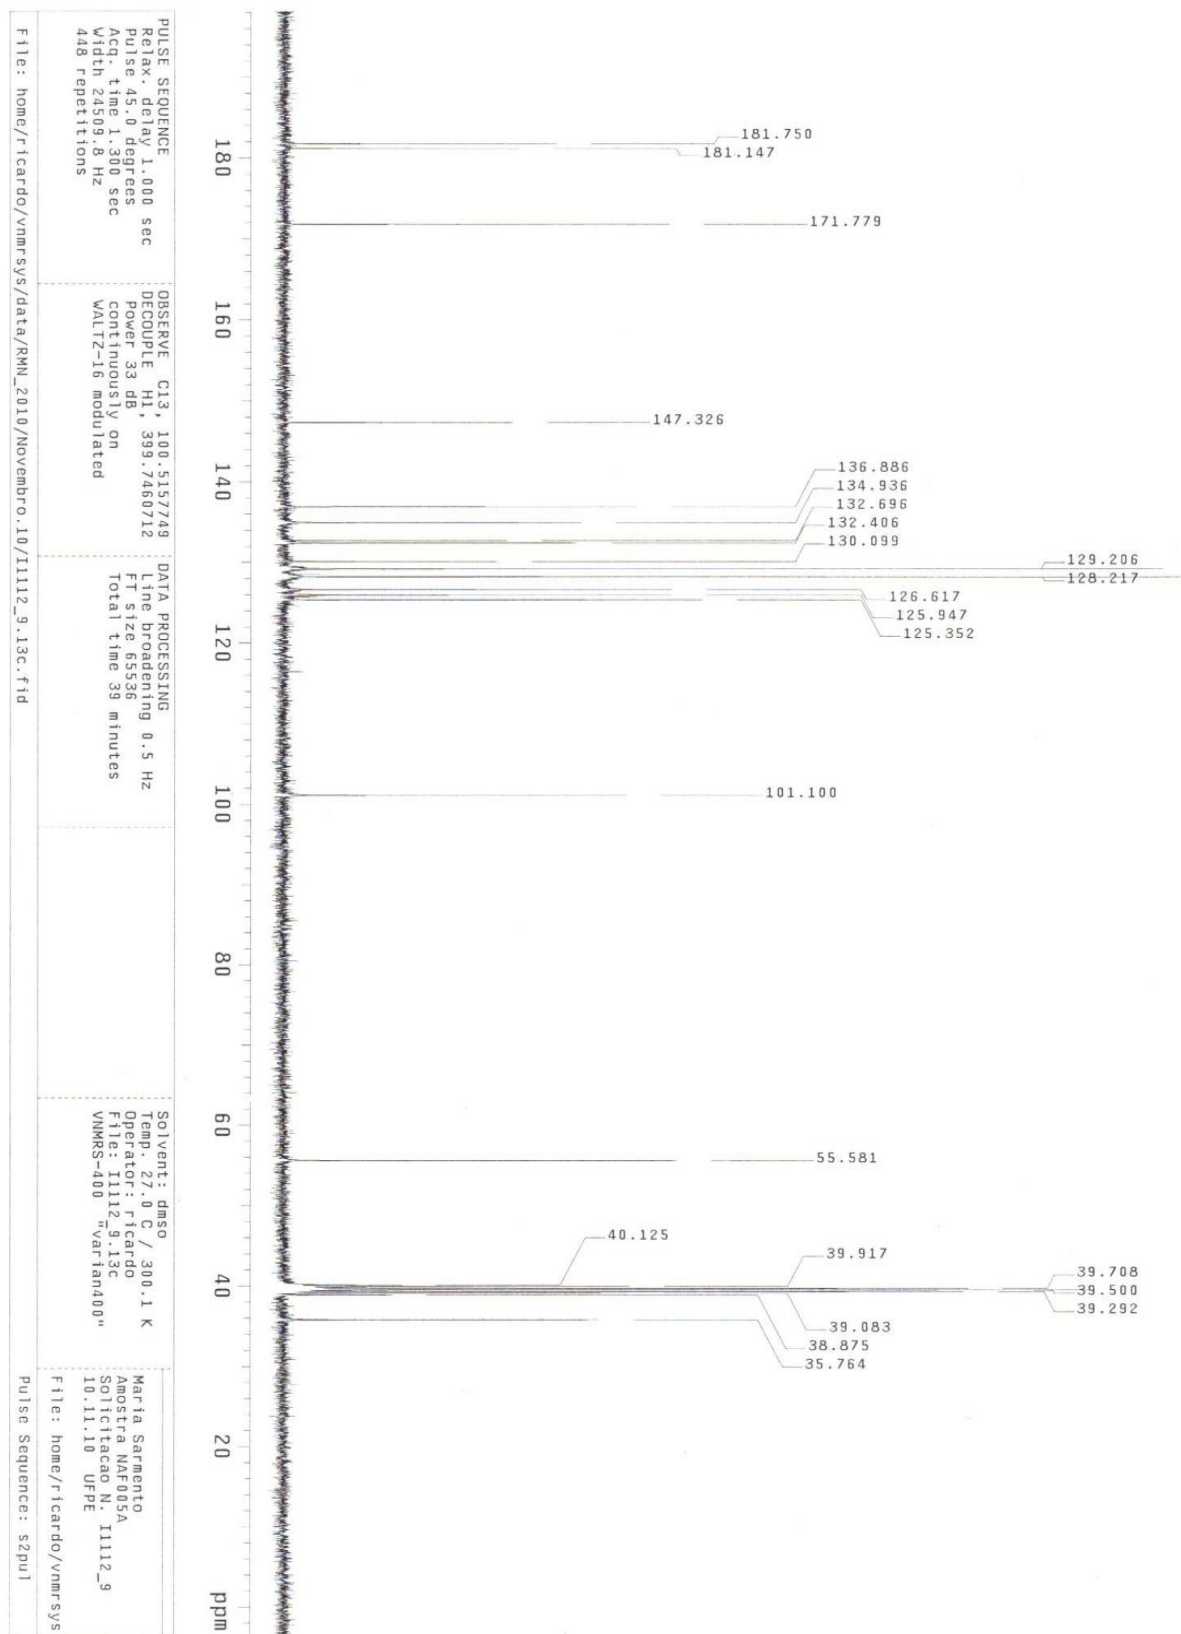



Figure S16. IR (ATR) of 7.

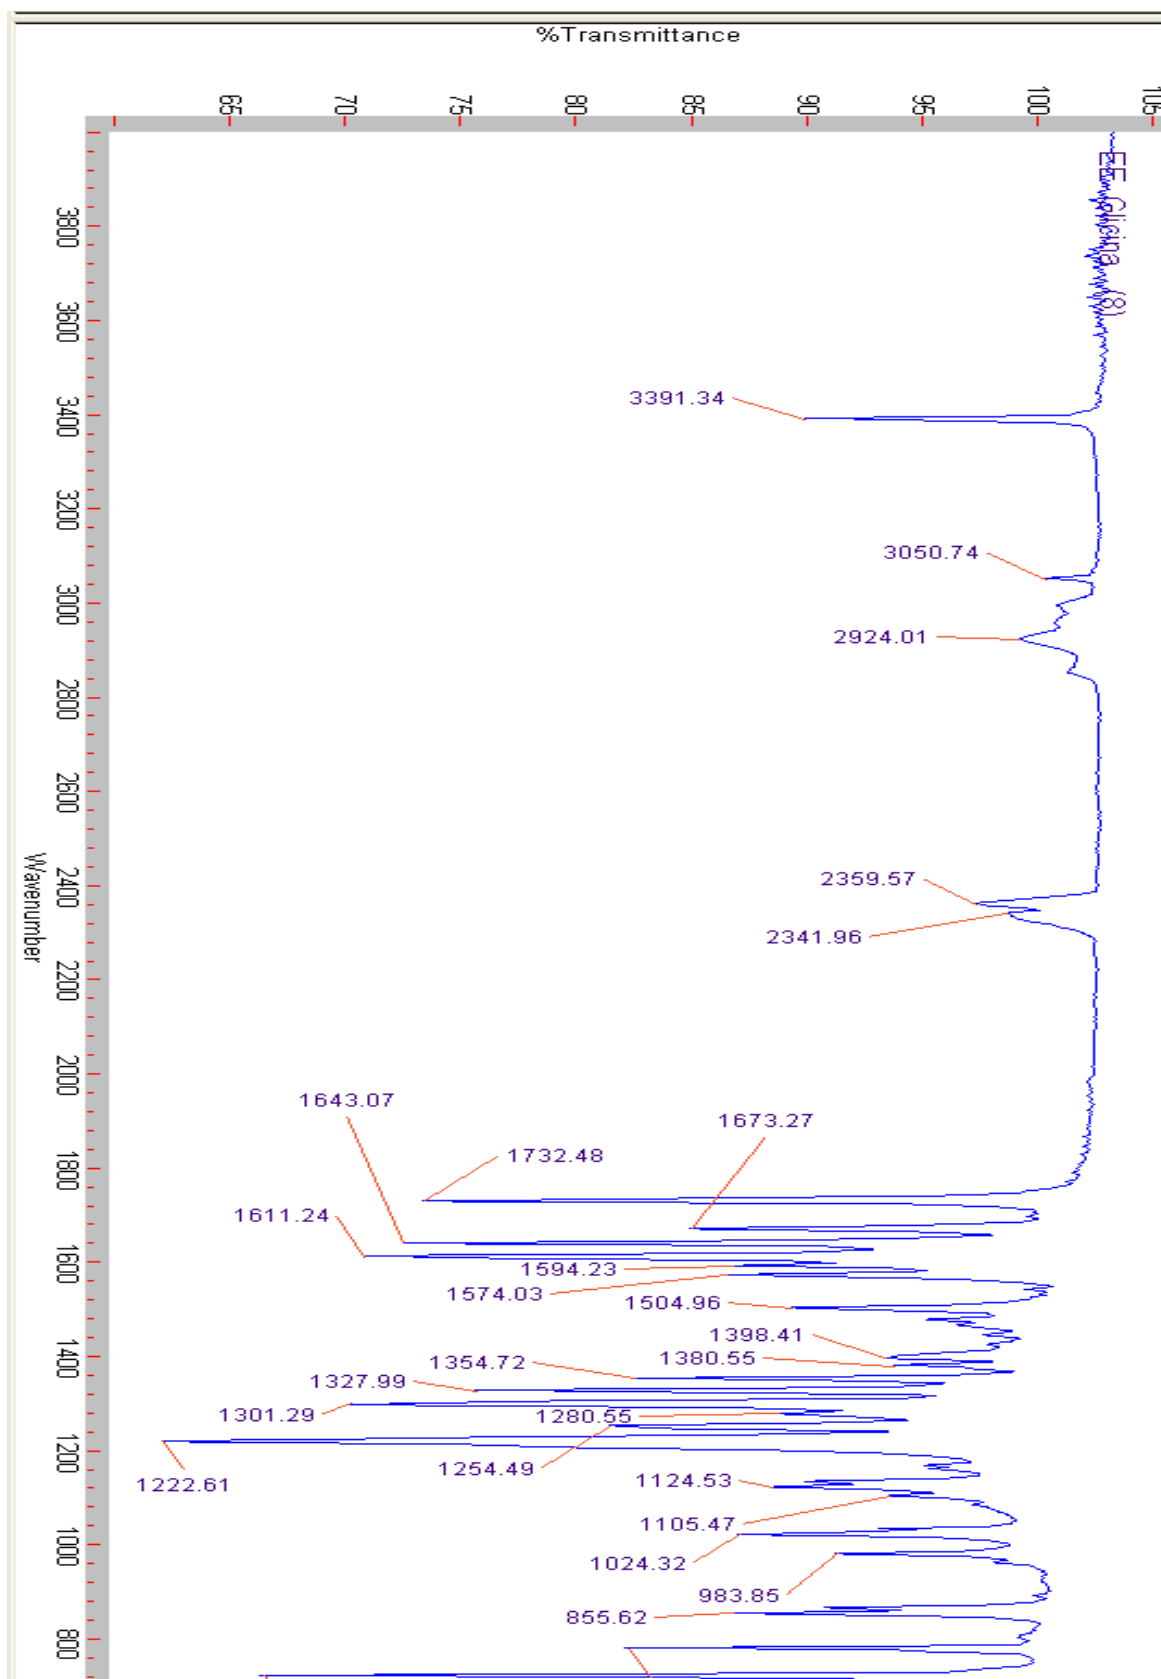

Figure S17. <sup>1</sup>H NMR (200 MHz, CDCl<sub>3</sub>) and expansion of 7.

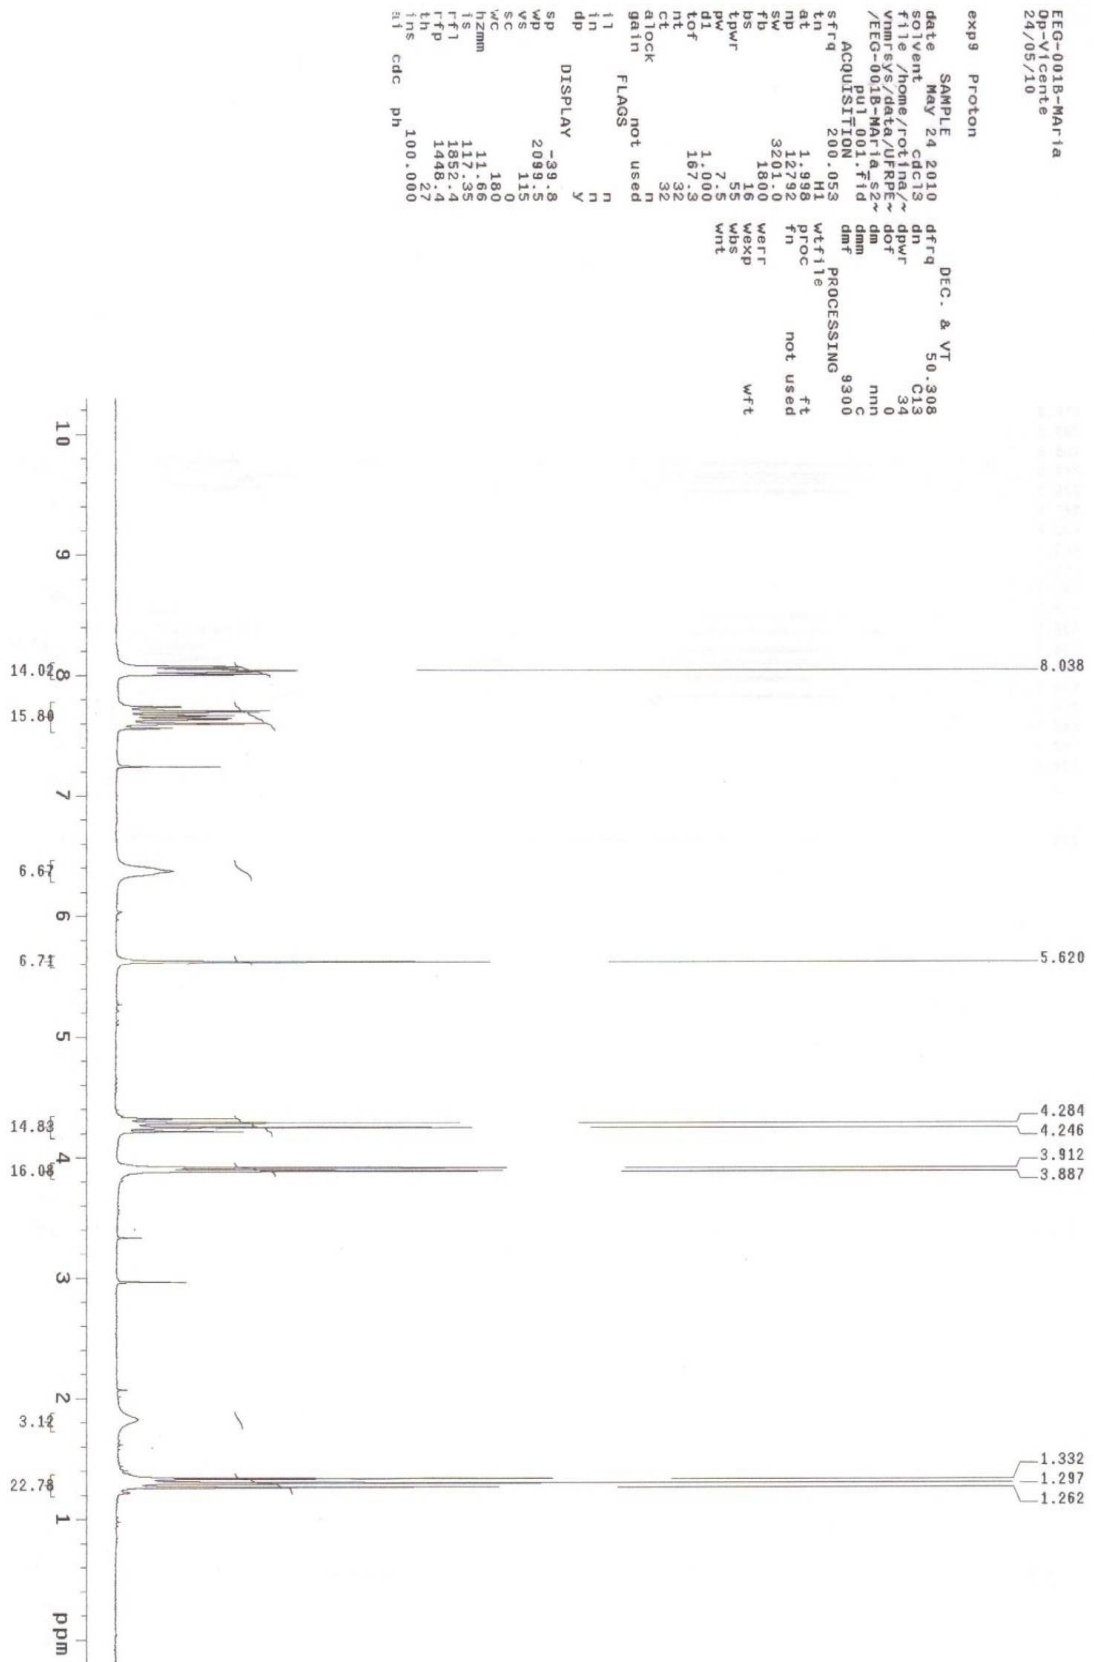

Figure S17. Cont.

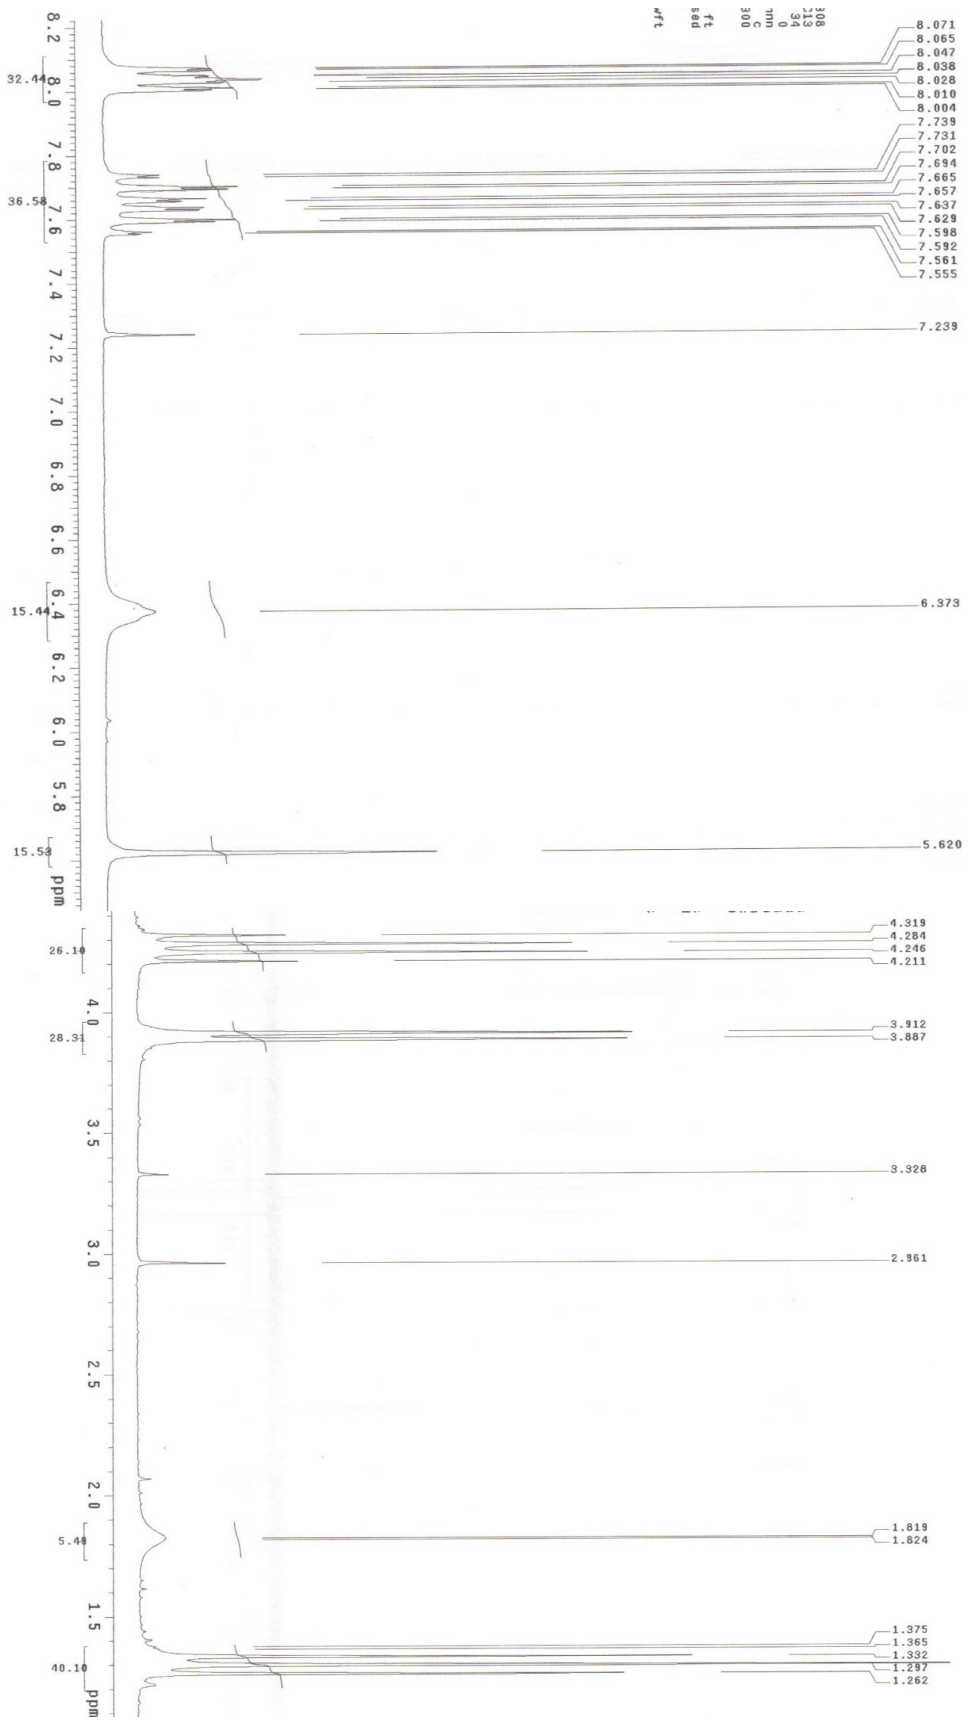

Figure S18. <sup>13</sup>C NMR (APT, 50 MHz, CDCl<sub>3</sub>) of 7.

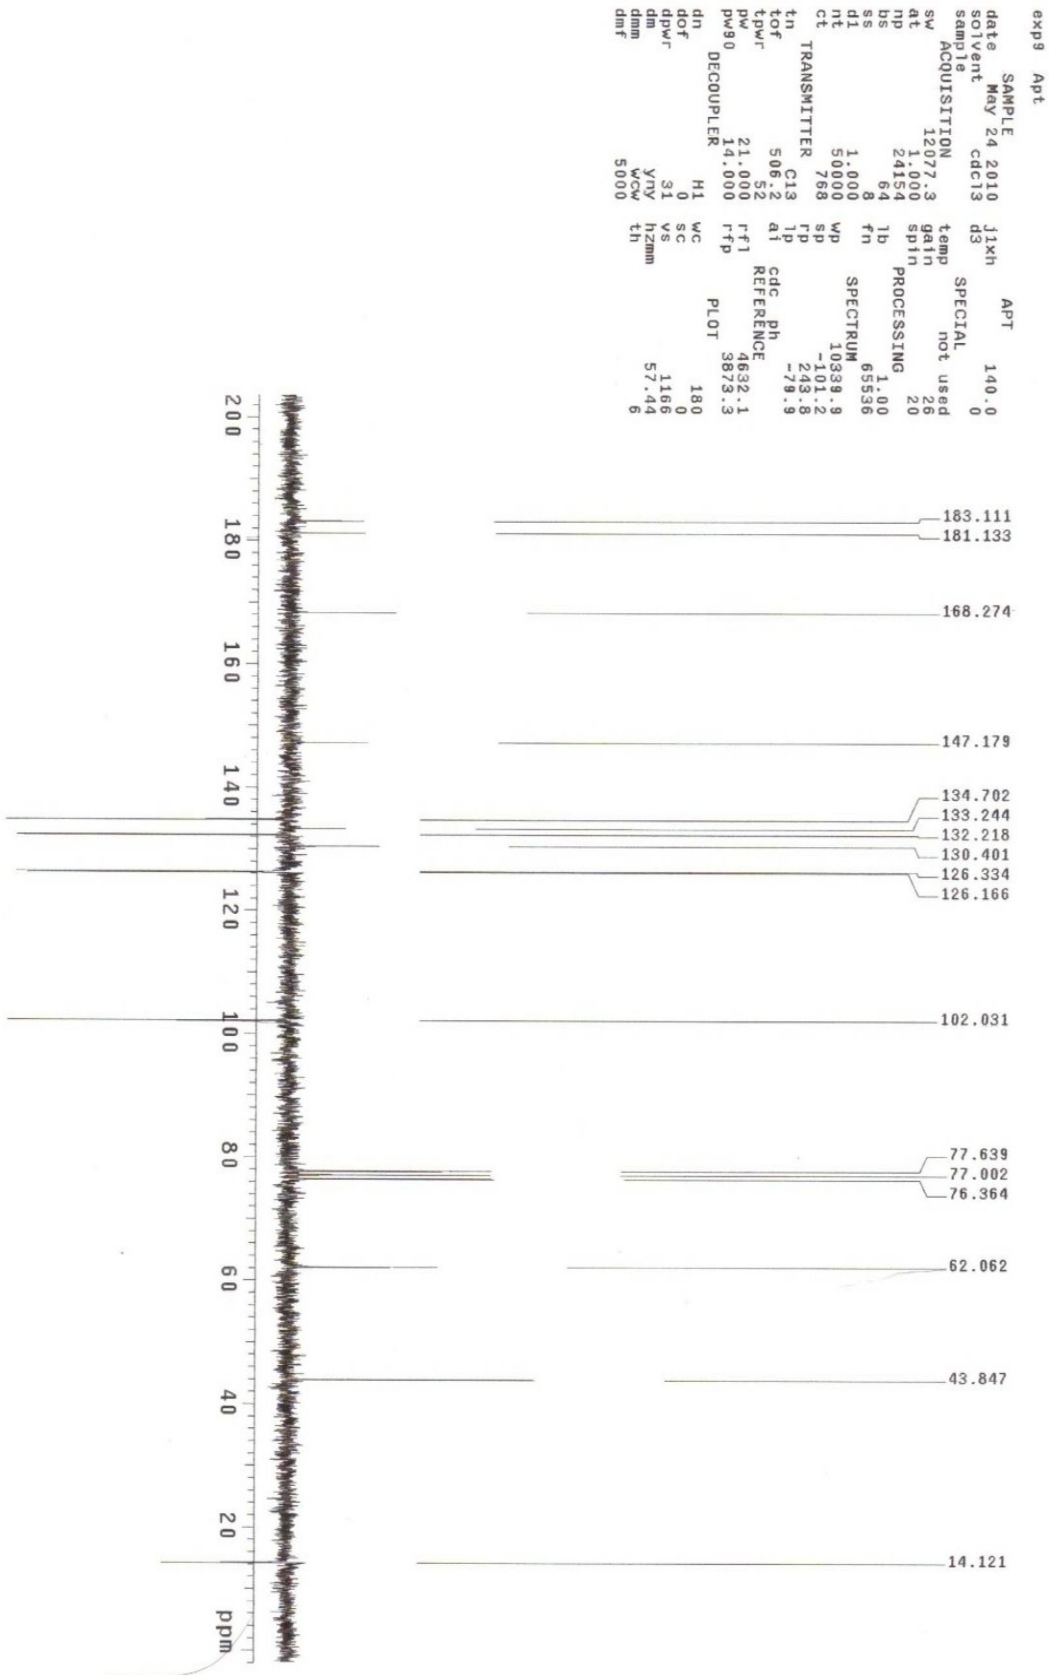

Figure S19. IR (ATR,  $\text{cm}^{-1}$ ) of 9.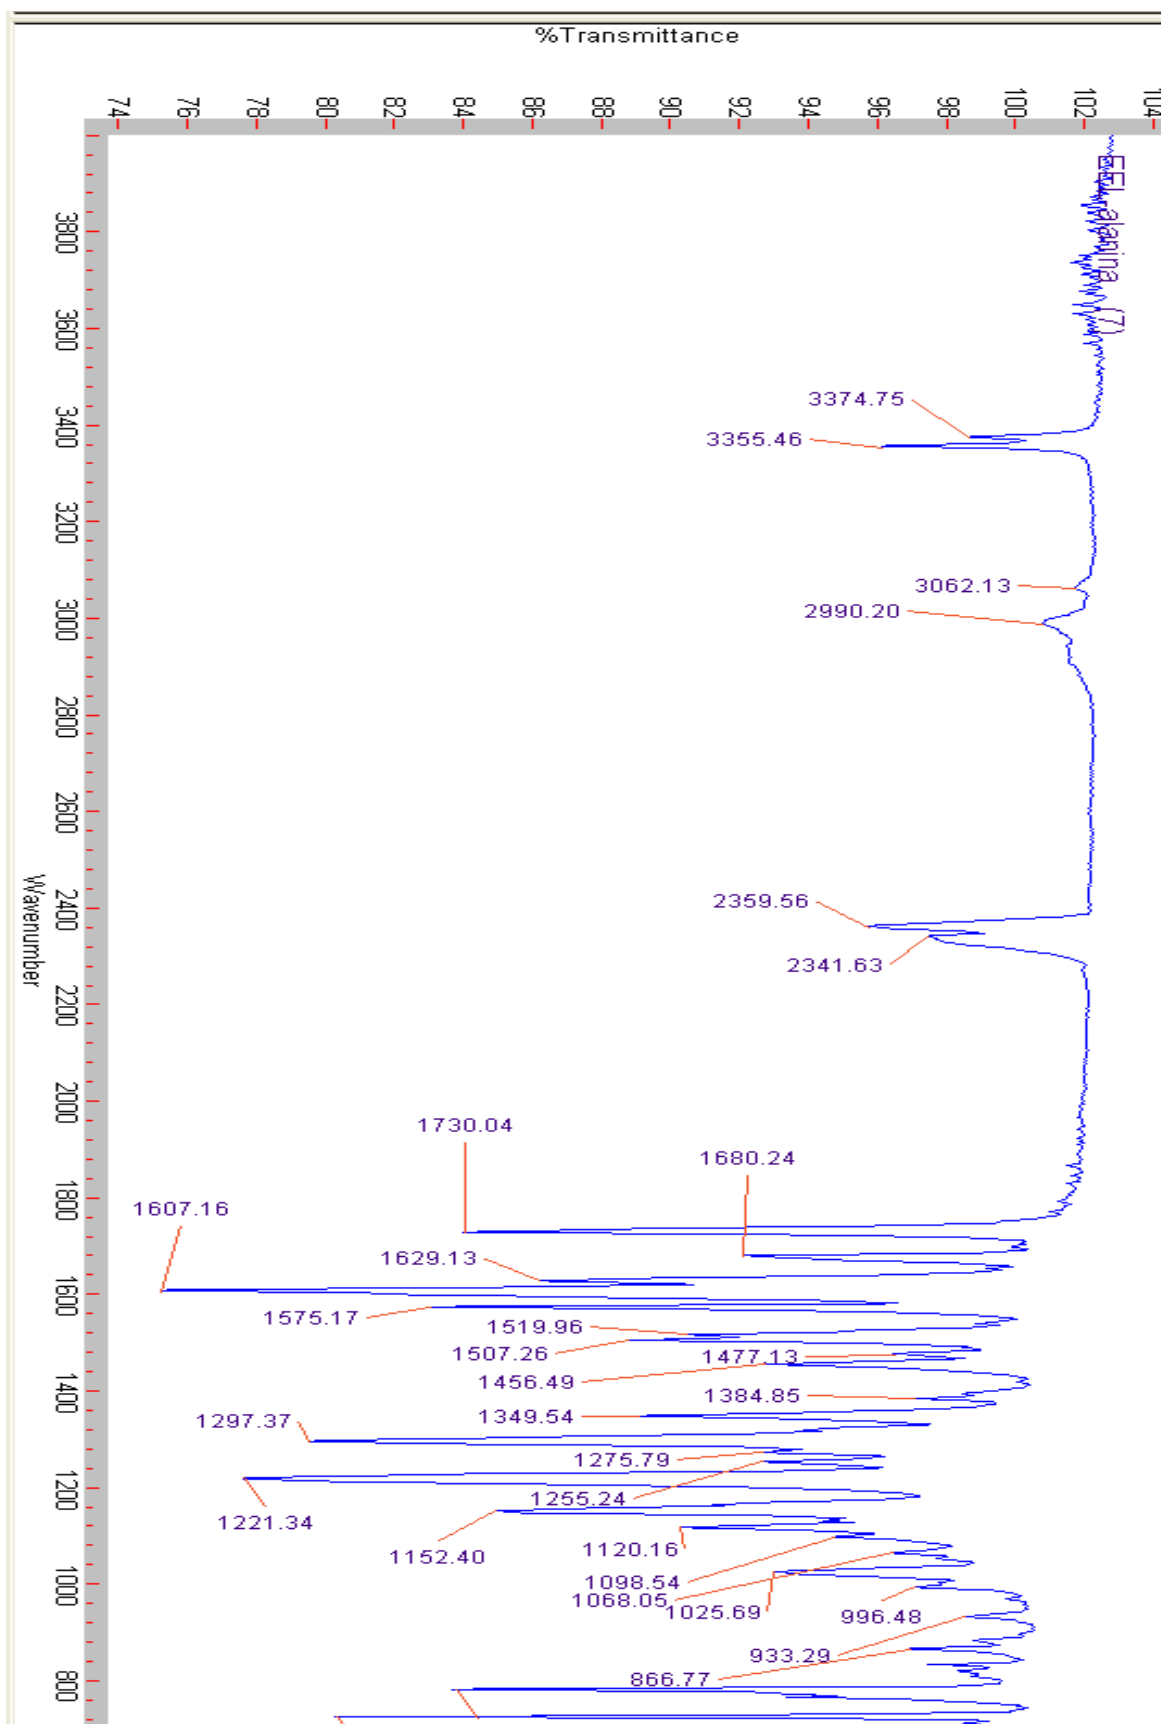

Figure S20.  $^1\text{H}$  NMR (200 MHz,  $\text{CDCl}_3$ ) and expansion of **9**.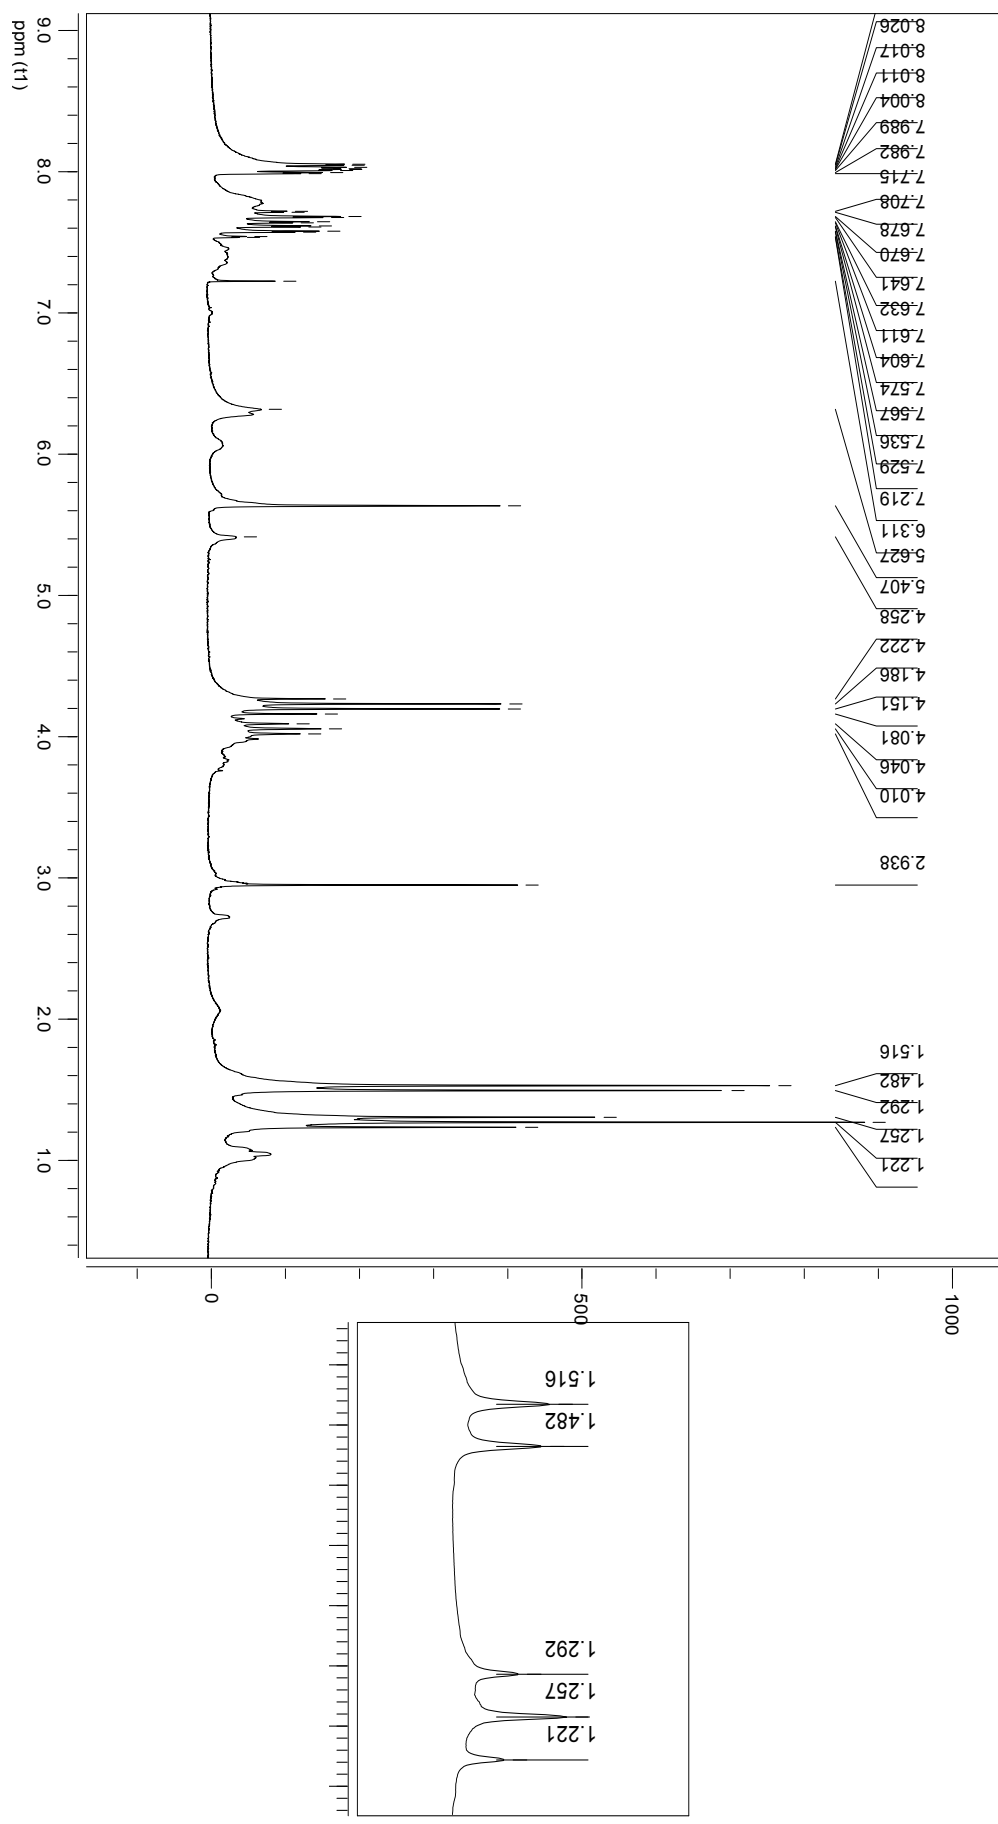

Figure S21.  $^{13}\text{C}$  NMR-APT ( $\delta$ ,  $\text{CDCl}_3$ , 50 MHz) of **9**.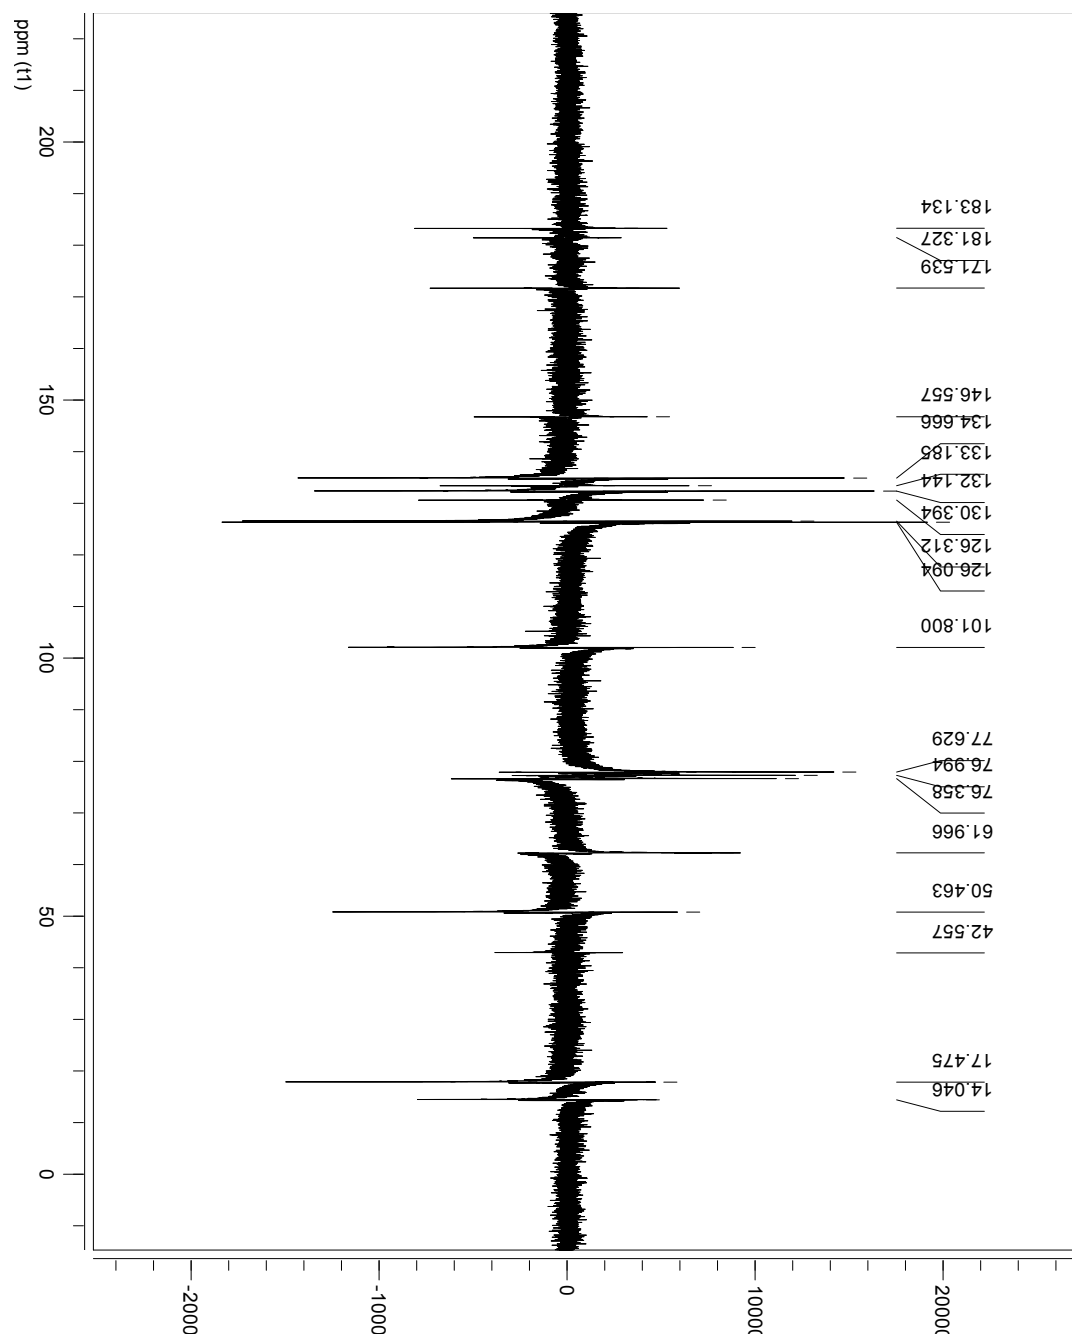

Figure S22. IR (ATR) of 8.

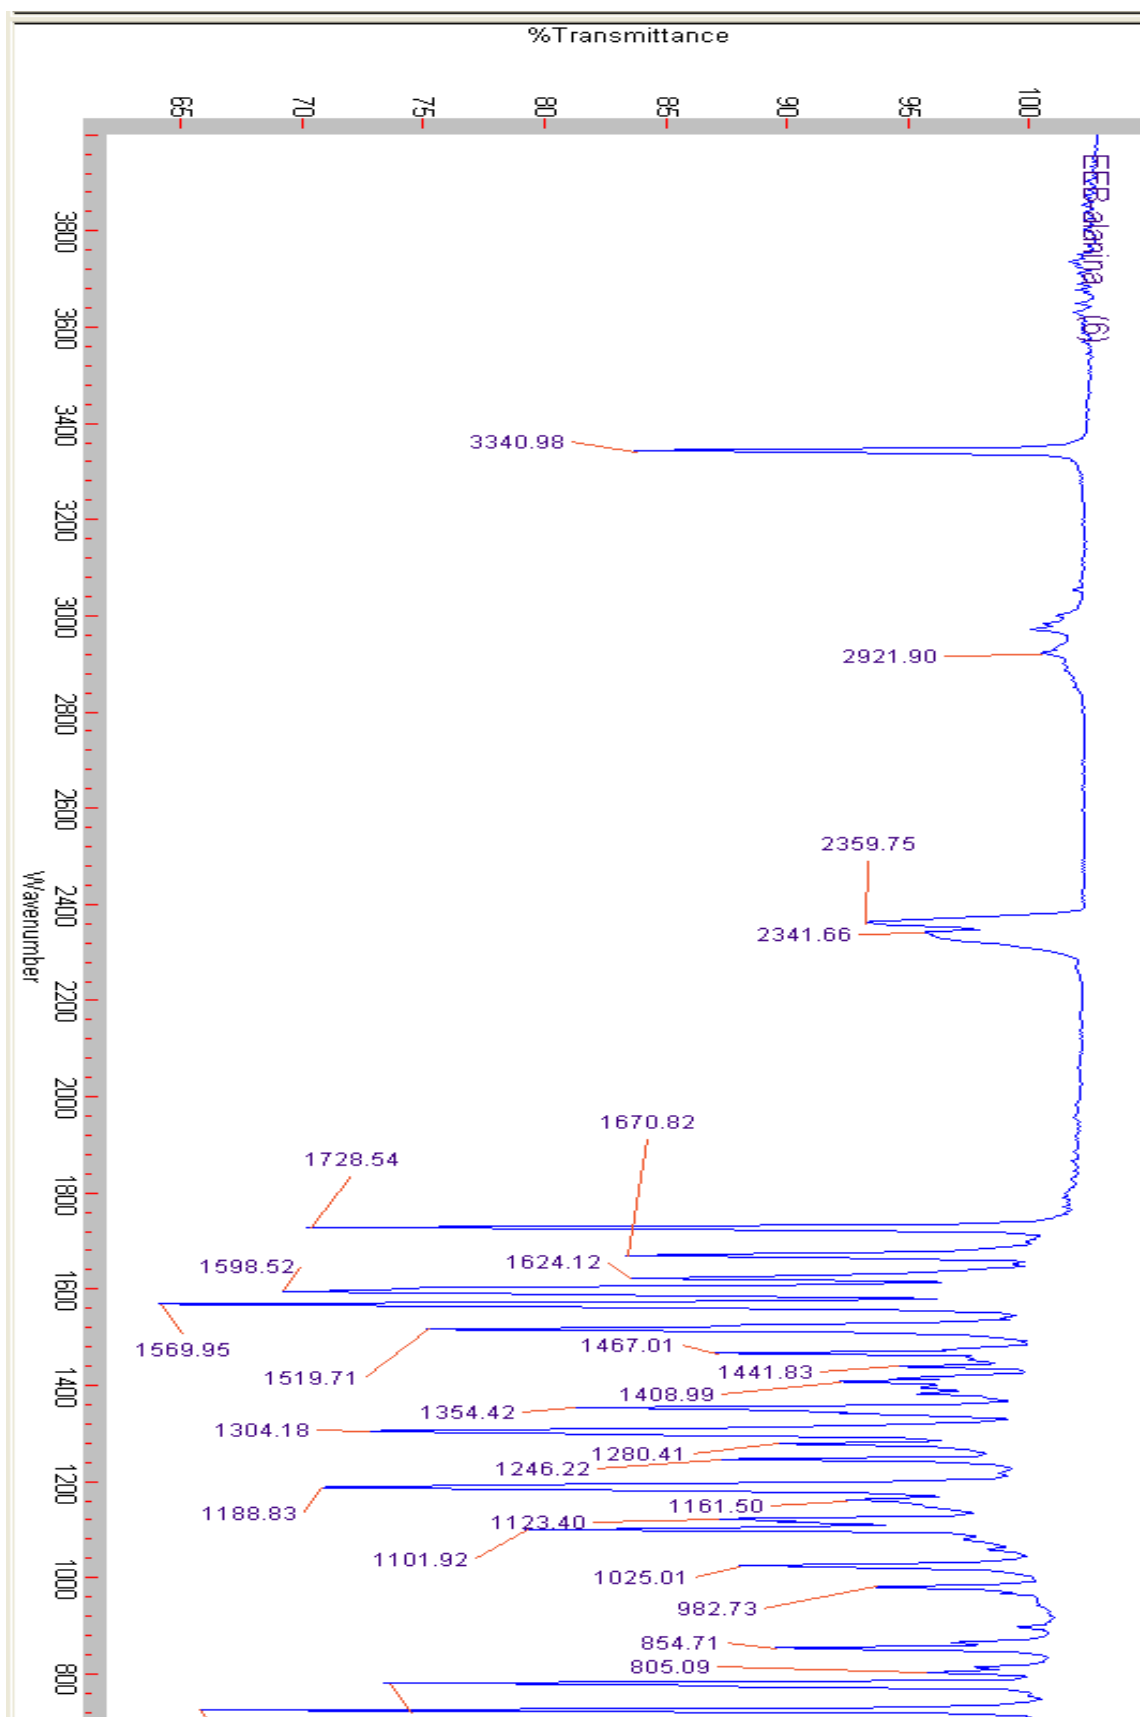



Figure S23.  $^1\text{H}$  NMR ( $\delta$ ,  $\text{CDCl}_3$ , 200 MHz) of 8.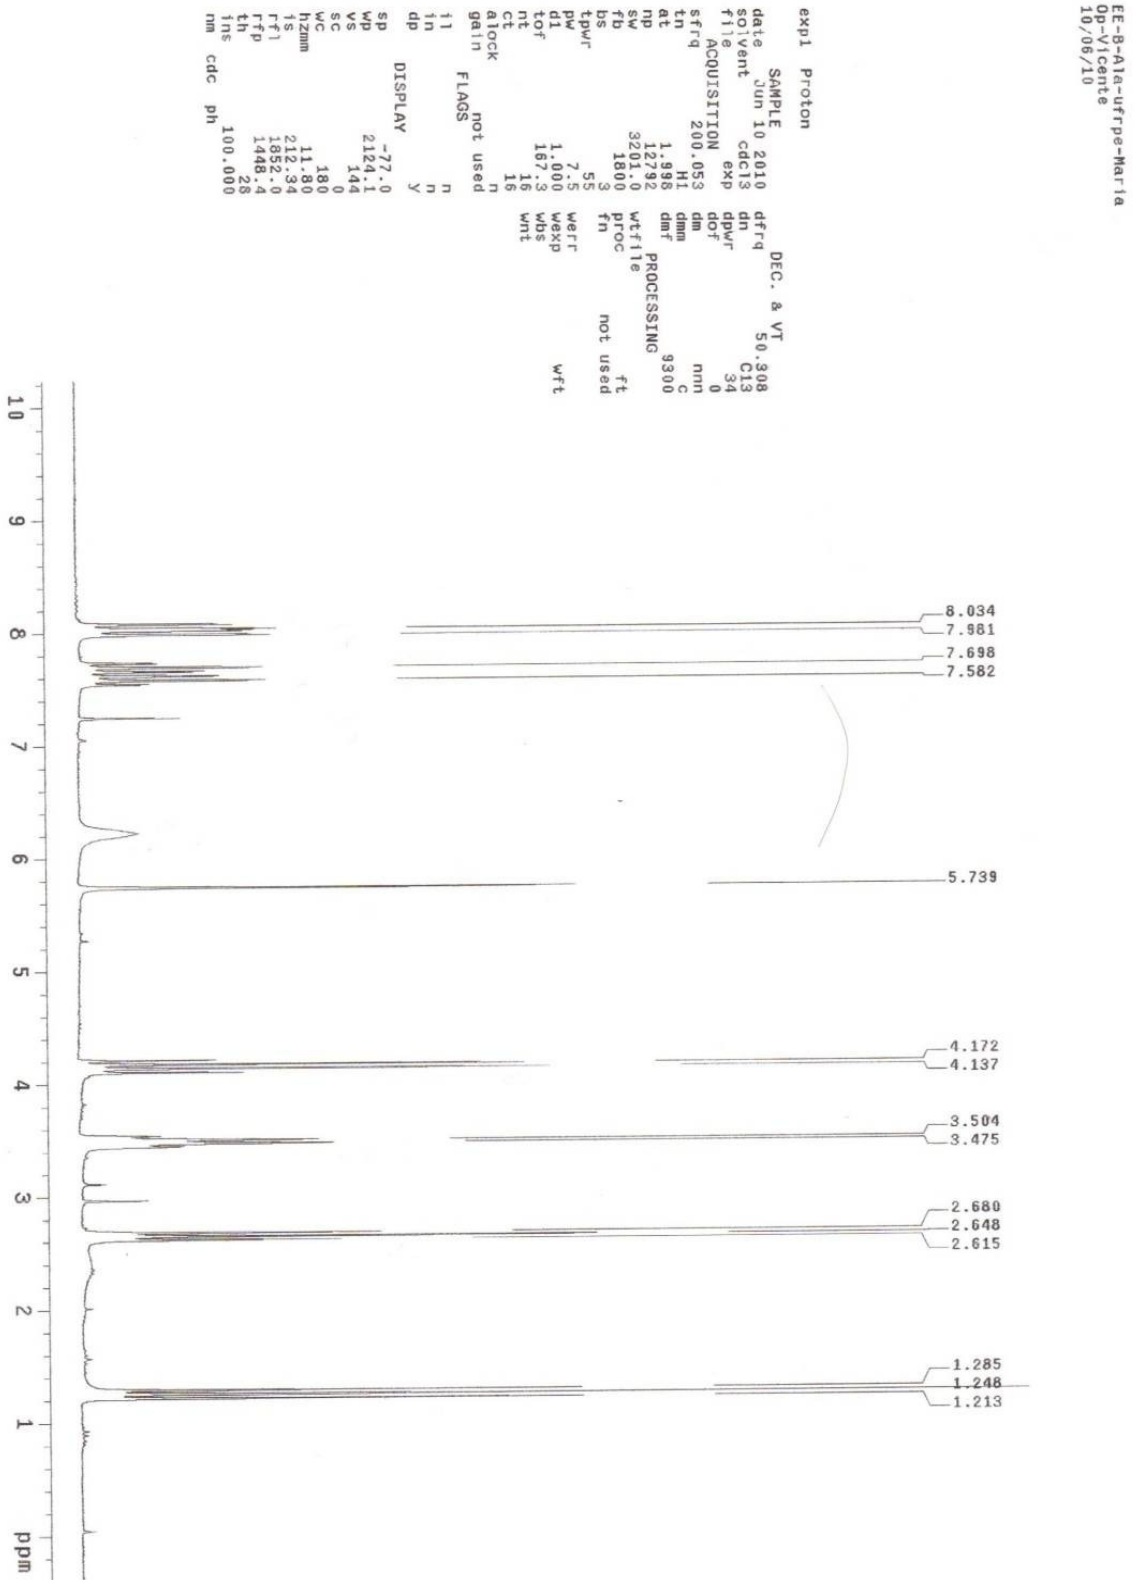

**Figure S24.**  $^1\text{H}$  NMR ( $\delta$ ,  $\text{CDCl}_3$ , 200 MHz) expansions of **8**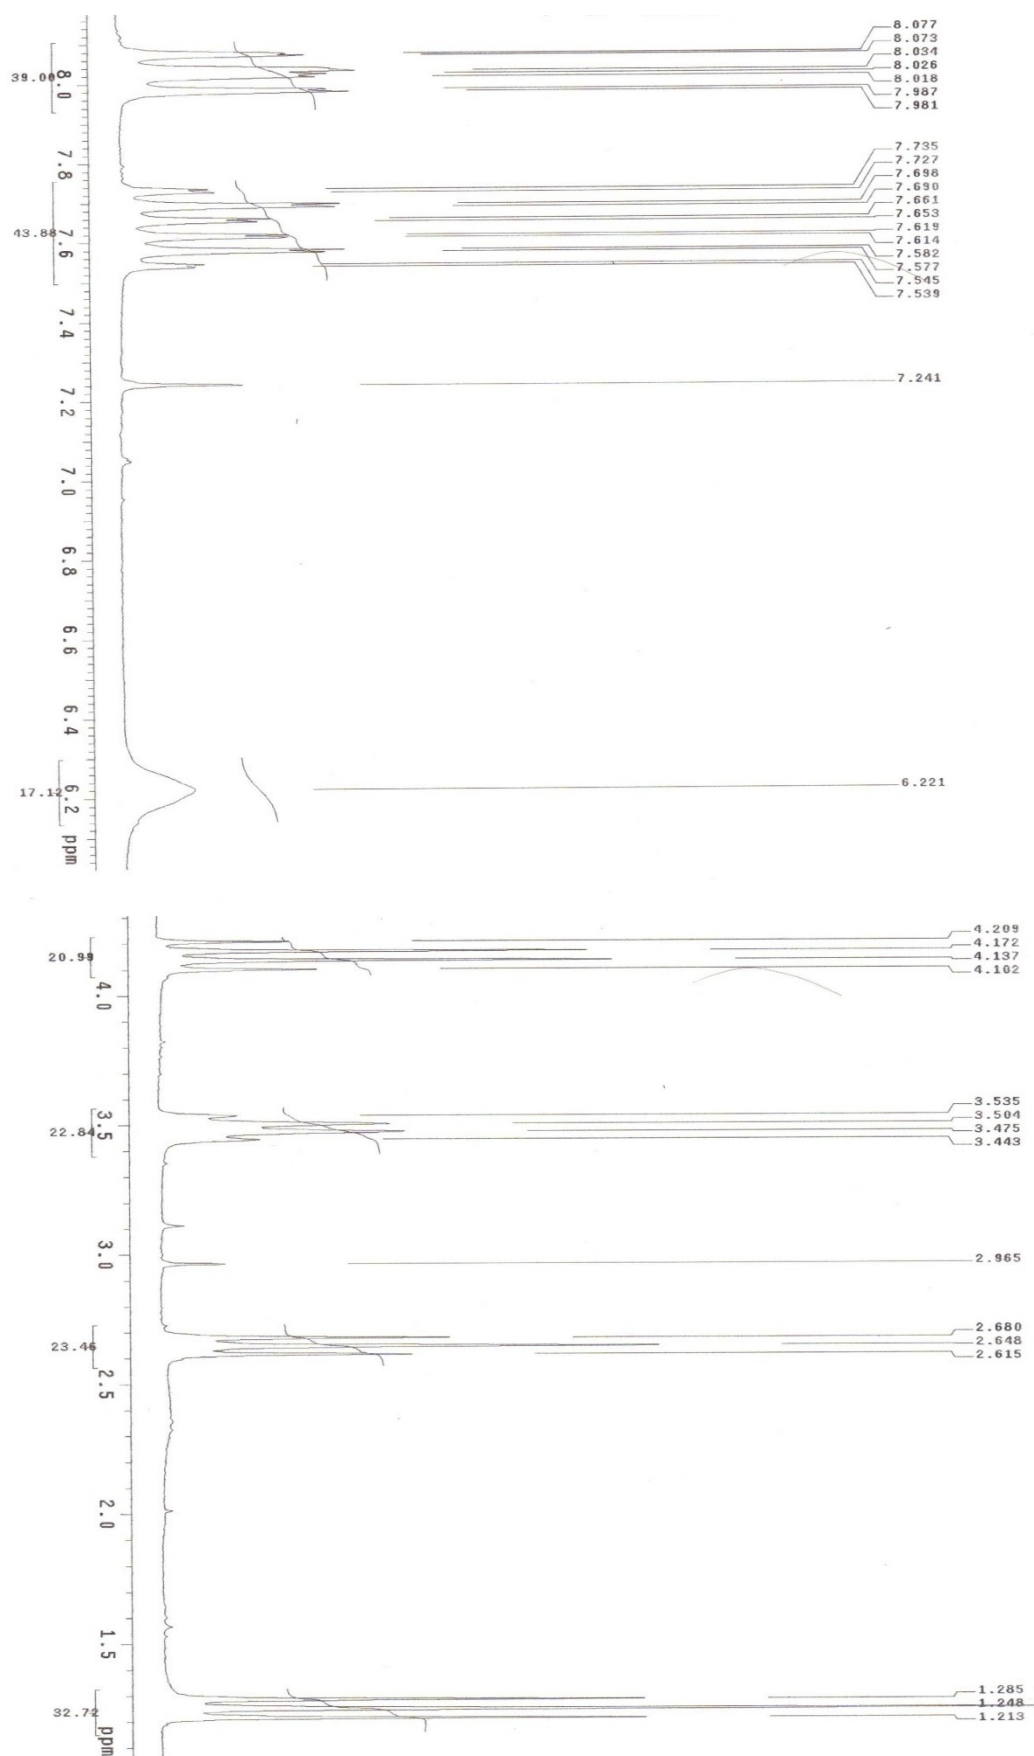

Figure S25. <sup>13</sup>C NMR (APT δ, CDCl<sub>3</sub>, 50 MHz) of **8**.

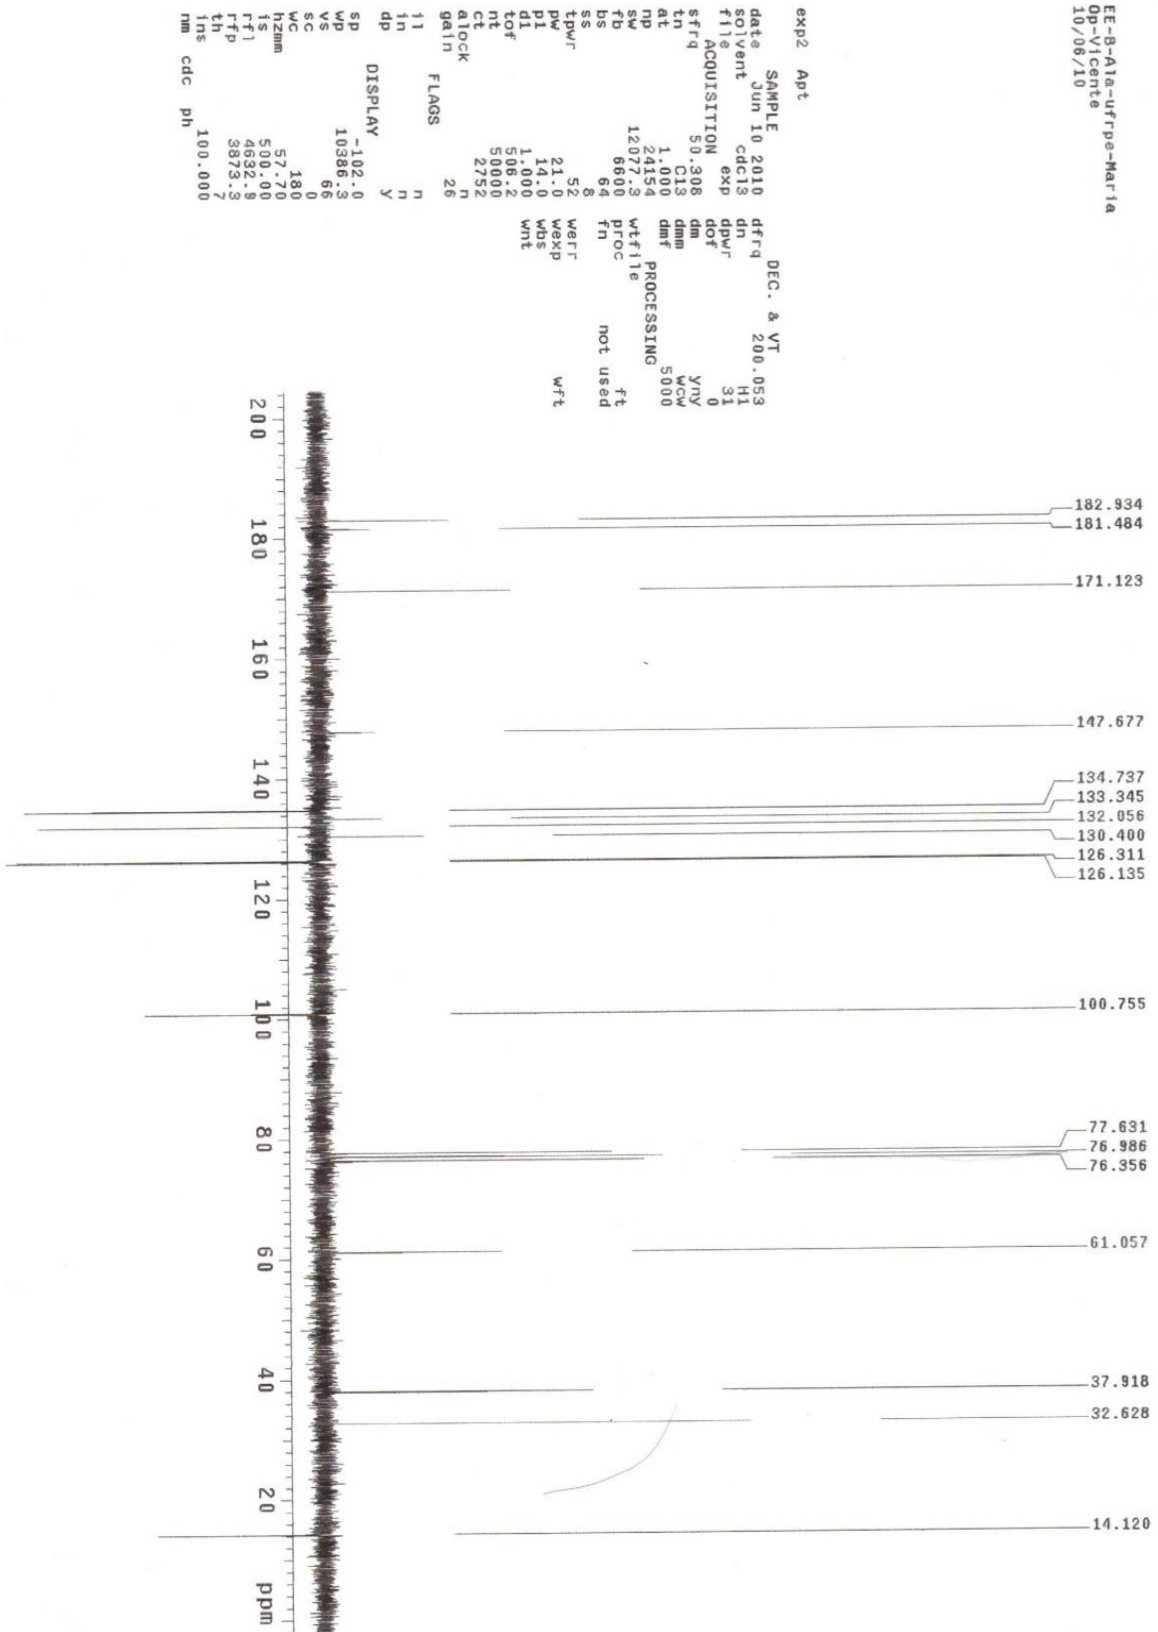

Figure S26. IR (ATR) of 10.

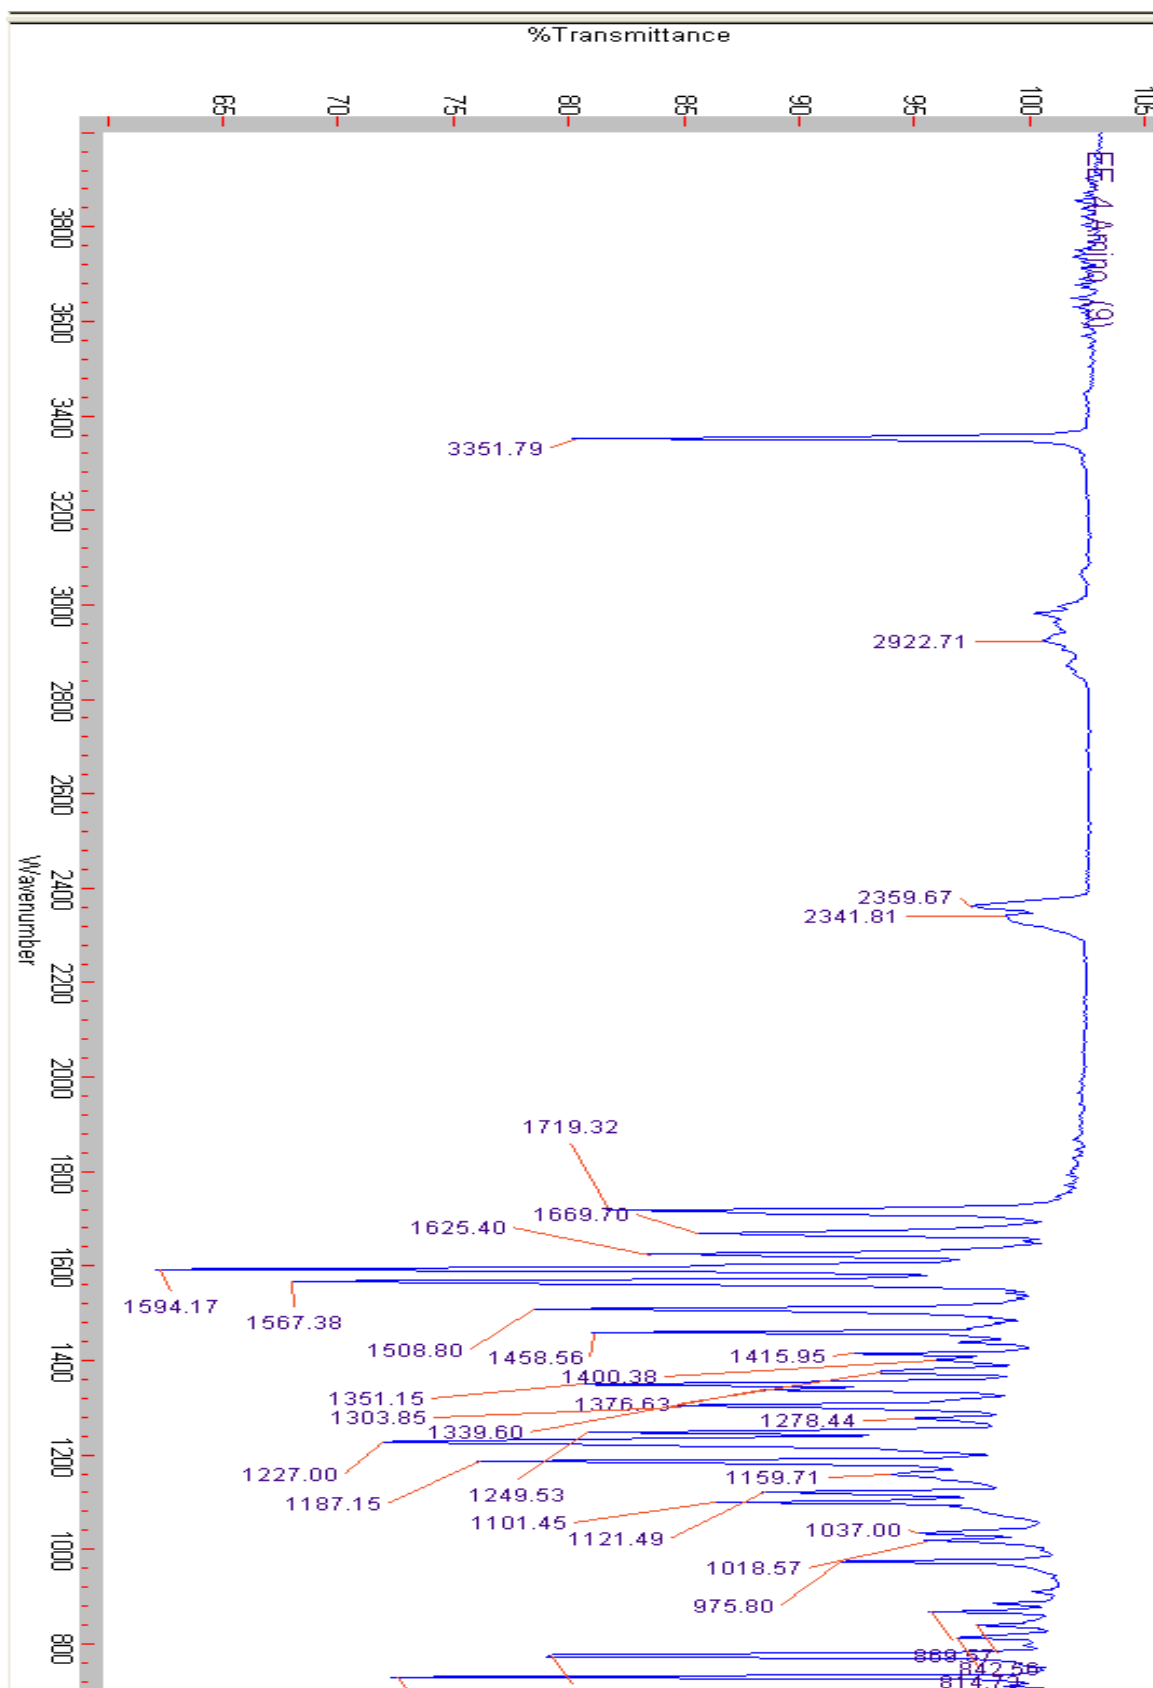



Figure S27. Cont.

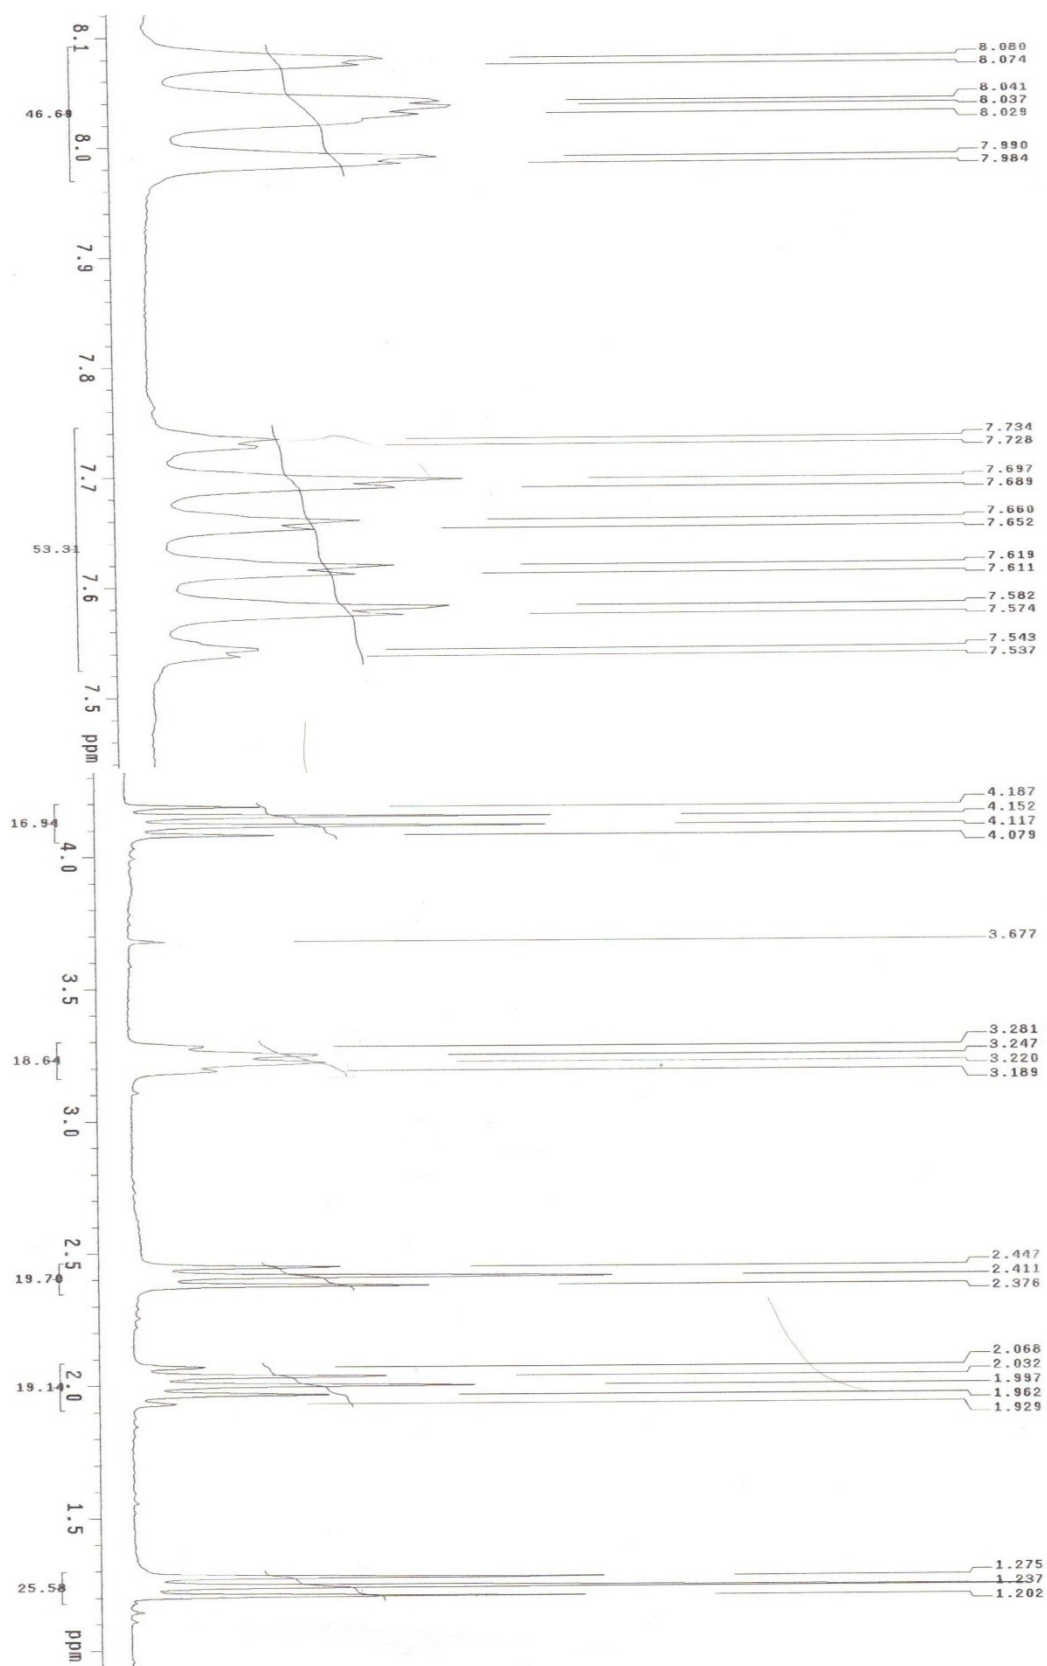



Figure S29. IR (ATR) of 11.

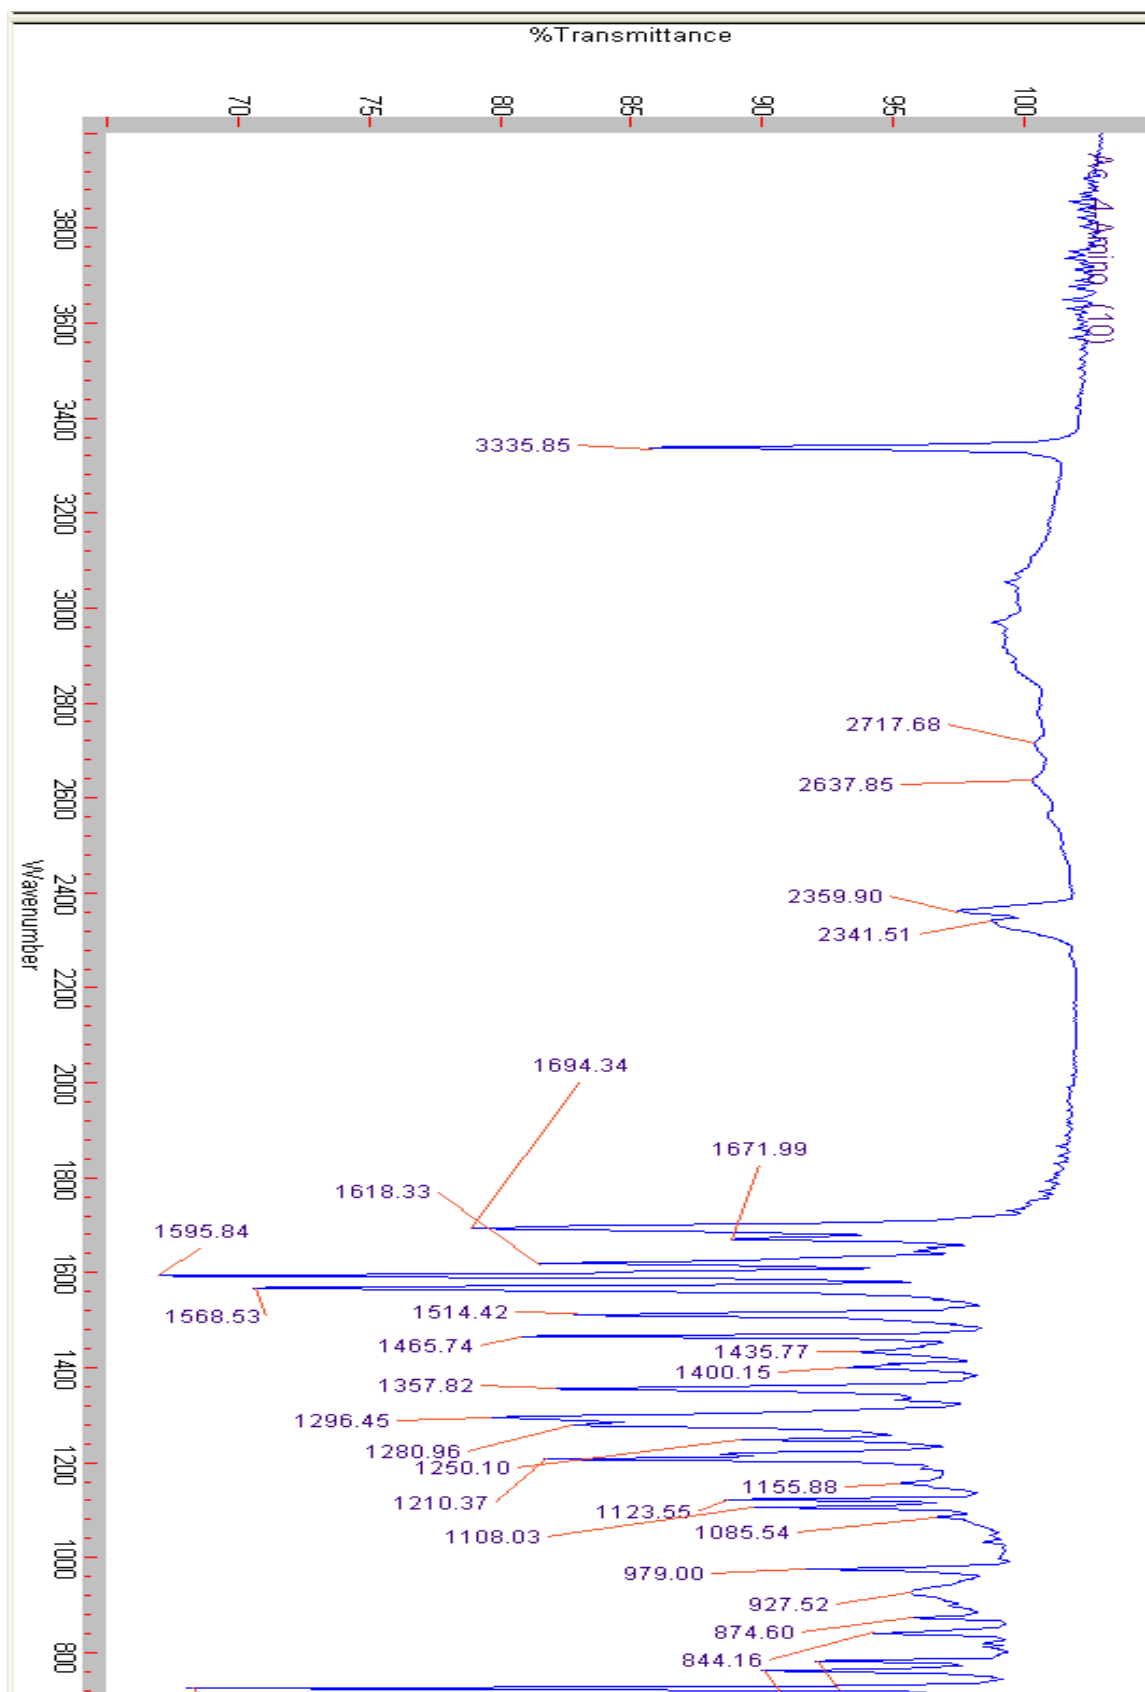



Figure S30.  $^1\text{H}$  NMR (DMSO- $d_6$ , 300 MHz) and expansions of 11.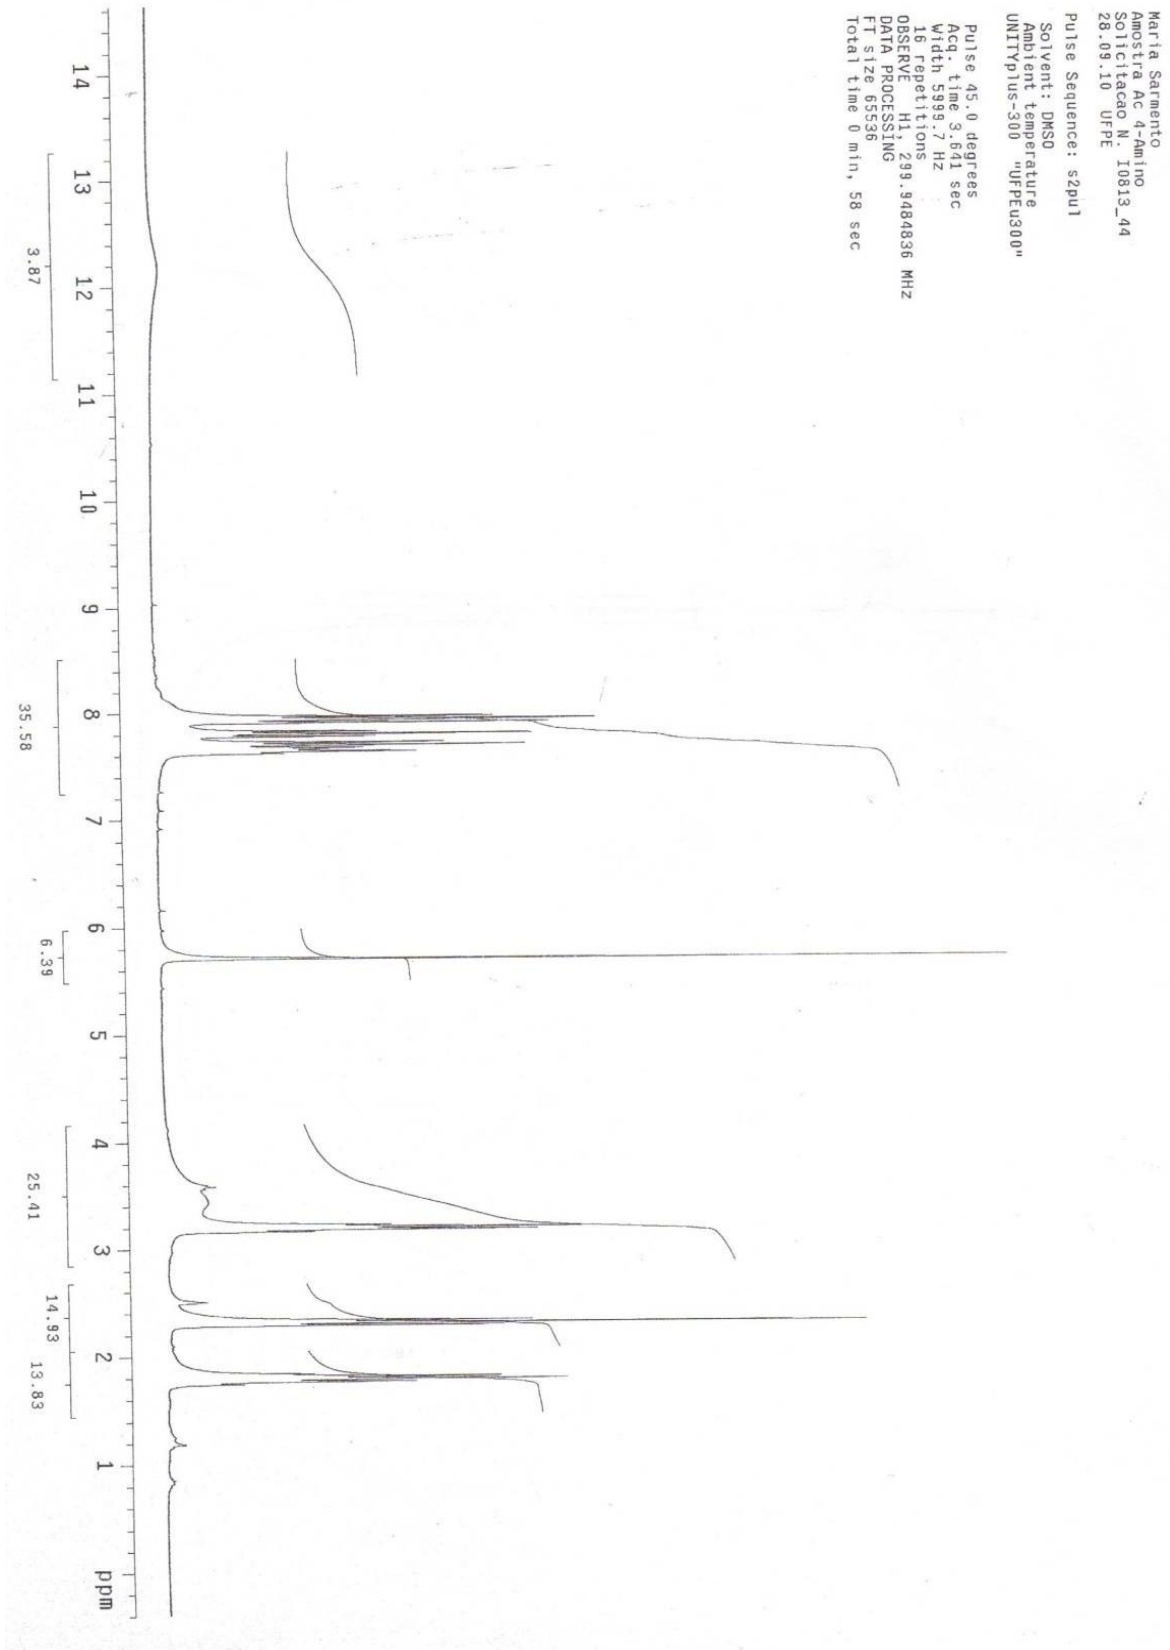

Figure S30. Cont.

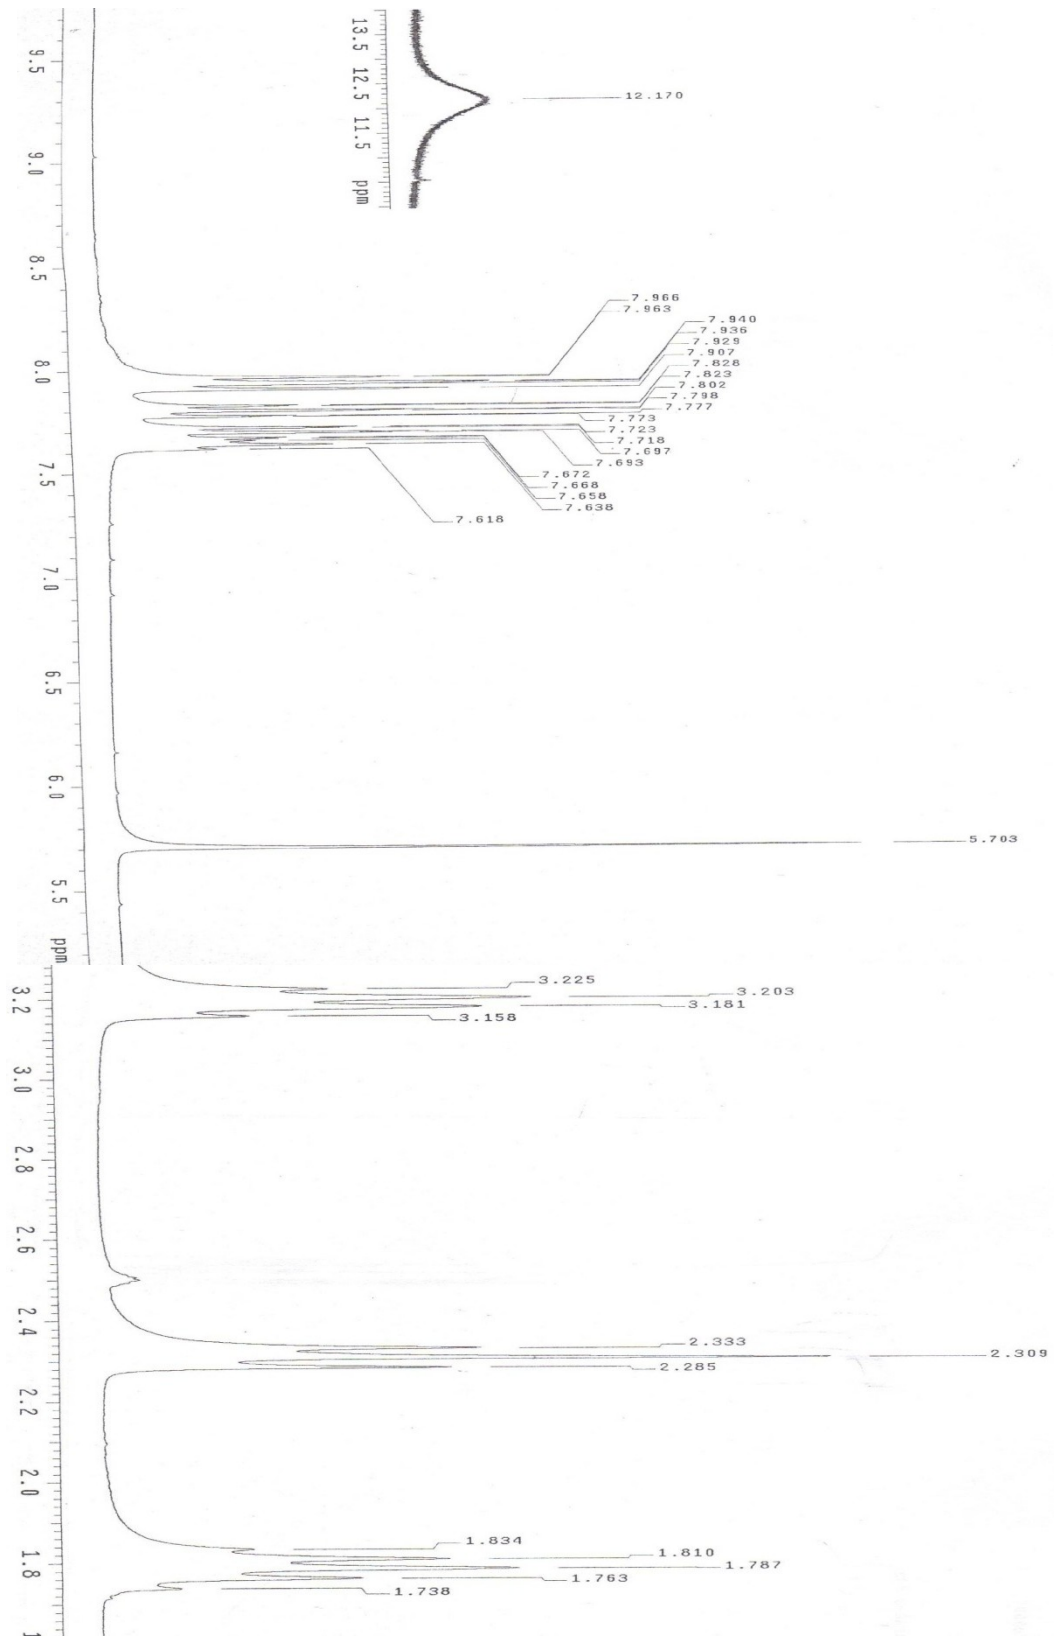

Figure S31.  $^{13}\text{C}$  NMR (DMSO- $d_6$ , 75 MHz) and expansions of **11**.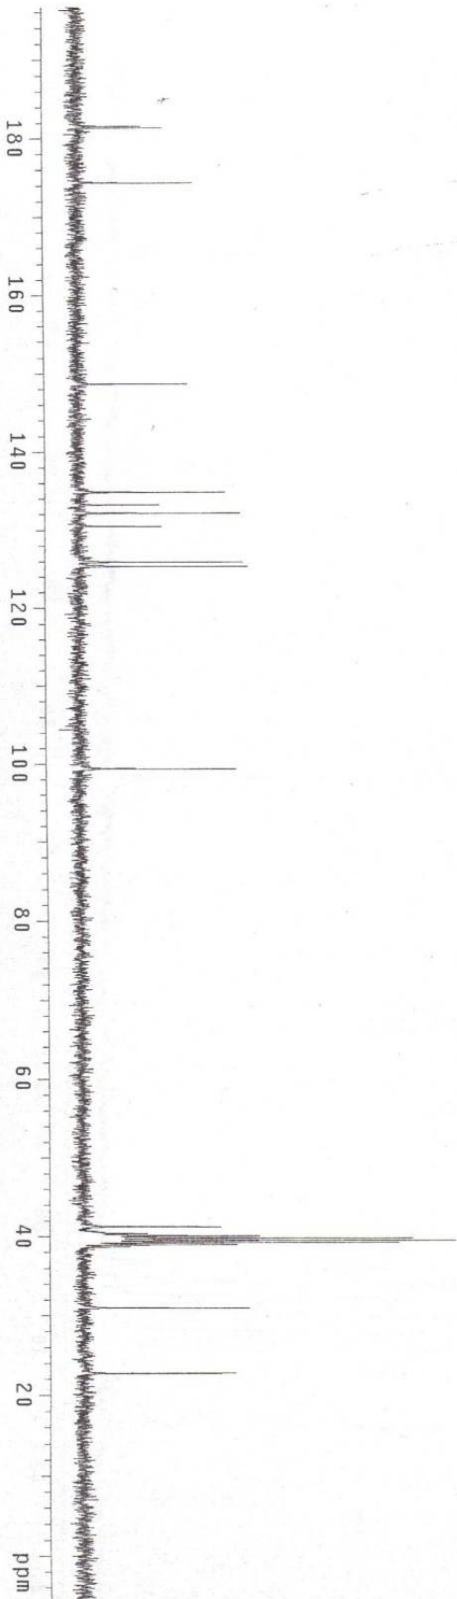

Maria Sarmento  
Amostra AC 4-Amino  
Solicitacao N. 10813\_44  
28.09.10 UJPE

Pulse Sequence: s2pul1  
Solvent: DMSO  
Ambient temperature  
UNITYplus-300 "ujfpeu300"

Pulse 30.0 degrees  
Acq. time 1.000 sec  
Width 18639.0 Hz  
418 repetitions  
OBSERVE C13, 75.4221376 MHz  
DECOUPLE H1, 299.9499835 MHz  
Power 36 db  
on during acquisition  
off during delay  
WALTZ-16 modulated  
DATA PROCESSING  
Line broadening 1.0 Hz  
FT size 65536  
Total time 34 min, 30 sec

Figure S31. *Cont.*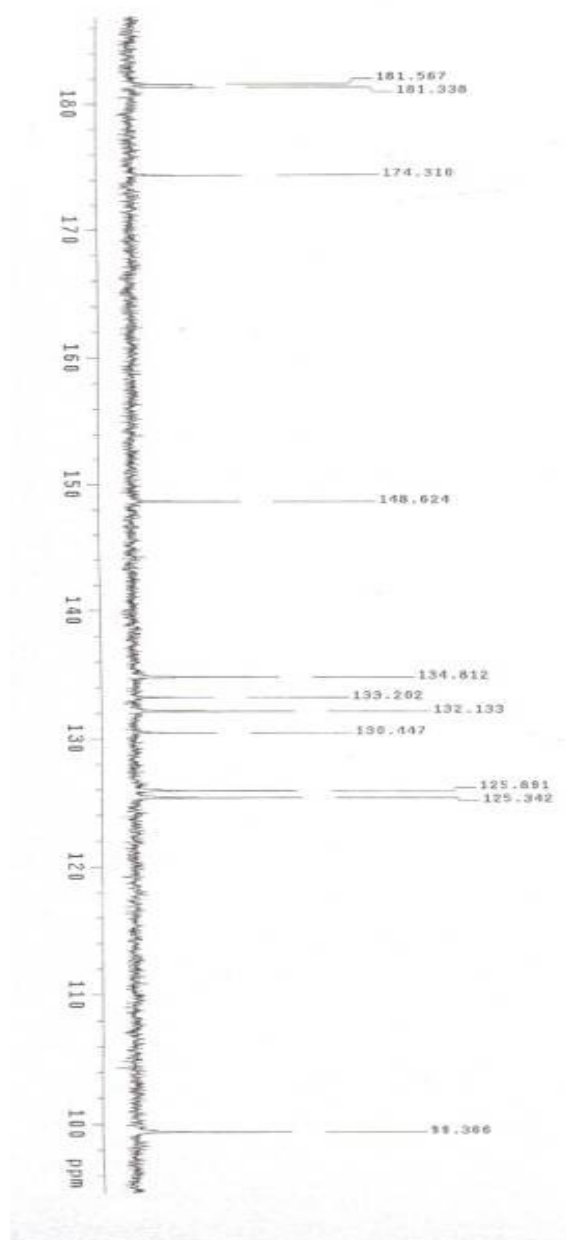

Supplement: molecules-19-13188-s001.pdf [file molecules-19-13188-s001.pdf]
